# Supplementary material for: Randomised placebo-controlled study of the effect of paracetamol on asthma severity in adults
Source: PubMed Central journal article supplement — BMJ Open. 2014 Feb 13;4(2):e004324. doi: 10.1136/bmjopen-2013-004324 (PMC3927716; doi:10.1136/bmjopen-2013-004324), 2014-02-13
Supplement: bmjopen-2013-004324.draft_revisions.pdf [file bmjopen-2013-004324.draft_revisions.pdf]

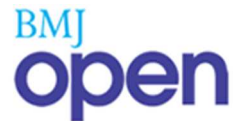

**RANDOMISED PLACEBO CONTROLLED STUDY OF THE EFFECT  
OF PARACETAMOL ON ASTHMA SEVERITY IN ADULTS**

|                                 |                                                                                                                                                                                                                                                                                                                                                                                                                                                                                                                                                                                                                                                                      |
|---------------------------------|----------------------------------------------------------------------------------------------------------------------------------------------------------------------------------------------------------------------------------------------------------------------------------------------------------------------------------------------------------------------------------------------------------------------------------------------------------------------------------------------------------------------------------------------------------------------------------------------------------------------------------------------------------------------|
| Journal:                        | <i>BMJ Open</i>                                                                                                                                                                                                                                                                                                                                                                                                                                                                                                                                                                                                                                                      |
| Manuscript ID:                  | bmjopen-2013-004324                                                                                                                                                                                                                                                                                                                                                                                                                                                                                                                                                                                                                                                  |
| Article Type:                   | Research                                                                                                                                                                                                                                                                                                                                                                                                                                                                                                                                                                                                                                                             |
| Date Submitted by the Author:   | 23-Oct-2013                                                                                                                                                                                                                                                                                                                                                                                                                                                                                                                                                                                                                                                          |
| Complete List of Authors:       | Eyers, Sally; Medical Research Institute of New Zealand, Williams, Mathew; Medical Research Institute of New Zealand, Jefferies, Sarah; Medical Research Institute of New Zealand, Perrin, Kyle; Medical Research Institute of New Zealand, Weatherall, Mark; University of Otago Wellington, Medicine Siebers, Robert; University of Otago Wellington, Medicine Crane, Julian; University of Otago Wellington, Medicine Patel, Mitesh; Medical Research Institute of New Zealand, Travers, Justin; Medical Research Institute of New Zealand, Shirtcliffe, Philippa; Medical Research Institute of New Zealand, Beasley, Richard; Medical Research Institute of NZ, |
| <b>Primary Subject Heading</b>: | Respiratory medicine                                                                                                                                                                                                                                                                                                                                                                                                                                                                                                                                                                                                                                                 |
| Secondary Subject Heading:      | Respiratory medicine                                                                                                                                                                                                                                                                                                                                                                                                                                                                                                                                                                                                                                                 |
| Keywords:                       | Asthma < THORACIC MEDICINE, Allergy < THORACIC MEDICINE, Respiratory physiology < THORACIC MEDICINE                                                                                                                                                                                                                                                                                                                                                                                                                                                                                                                                                                  |
|                                 |                                                                                                                                                                                                                                                                                                                                                                                                                                                                                                                                                                                                                                                                      |

SCHOLARONE™  
Manuscripts

only

1  
2  
3  
4  
5  
6  
7  
8  
9  
10  
11  
12  
13  
14  
15  
16  
17  
18  
19  
20  
21  
22  
23  
24  
25  
26  
27  
28  
29  
30  
31  
32  
33  
34  
35  
36  
37  
38  
39  
40  
41  
42  
43  
44  
45  
46  
47  
48  
49  
50  
51  
52  
53  
54  
55  
56  
57  
58  
59  
60

**RANDOMISED PLACEBO CONTROLLED STUDY OF THE EFFECT OF PARACETAMOL ON  
ASTHMA SEVERITY IN ADULTS**

<sup>1,2,3</sup>Sally Evers, <sup>1</sup>Mathew Williams, <sup>1,2</sup>Sarah Jefferies, <sup>1,2</sup>Kyle Perrin

<sup>2,3</sup>Mark Weatherall <sup>3</sup>Robert Siebers, <sup>3</sup>Julian Crane, <sup>1,2</sup>Mitesh Patel

<sup>1</sup>Justin Travers, <sup>1,2</sup>Philippa Shirtcliffe, <sup>1,2</sup>Richard Beasley

<sup>1</sup>Medical Research Institute of New Zealand, Wellington, New Zealand

<sup>2</sup>Capital & Coast District Health Board, Wellington, New Zealand

<sup>3</sup>University of Otago Wellington, Wellington, New Zealand

**Key words:** Asthma, paracetamol, randomised controlled trial, bronchial hyperresponsiveness

**Word count:** 3,607

**Running Title:** Effect of paracetamol on adult asthma

**Australia New Zealand Clinical Trials Registry Number:** ANZCTR12609000551291

**Central Regional Ethics Committee Number:** CEN/08/12/070

**Correspondence:**

Prof Richard Beasley  
Medical Research Institute of New Zealand  
Private Bag 7902, Wellington 6242  
New Zealand  
Telephone: 64-4-805 0230  
Fax: 64-4-389 5707  
Email: richard.beasley@mrnz.ac.nz

**ABSTRACT (word count 250)**

**Background:** Epidemiological evidence suggests that paracetamol may be a risk factor in the development of asthma and its severity. This is the first randomised placebo-controlled trial of the effect of regular paracetamol on bronchial responsiveness and asthma control in adult asthma.

**Methods:** In a 12-week randomised, double-blind, placebo-controlled, parallel-group study, 94 adults with mild to moderate asthma received 12 weeks of 1g paracetamol twice daily or placebo twice daily. The primary outcome variable was bronchial hyperresponsiveness, measured as the provocation concentration of methacholine causing a 20% fall in FEV<sub>1</sub> (PC<sub>20</sub> MCh), at week 12. Secondary outcome variables included FEV<sub>1</sub>, FeNO and ACQ score.

**Results:** 94 participants received randomised treatment (36 and 58 in the paracetamol and placebo groups respectively); 85 participants completed the study. At 12 weeks the mean (SD) logarithm base two PC<sub>20</sub> was 1.07 (2.36) in the control group (N=54) and 0.62 (2.09) in the paracetamol group (N=31). After controlling for baseline PC<sub>20</sub>, the difference (paracetamol minus placebo) was -0.48 doubling dose (95% CI -1.28 to 0.32), P=0.24. There were no statistically significant differences (paracetamol minus placebo) in log FeNO 0.09 (95% CI -0.097 to 0.27)), FEV<sub>1</sub> (-0.07 L (95% CI -0.15 to 0.01)), or ACQ score (-0.04 (95% CI -0.27 to 0.18)).

**Conclusions:** There was no significant effect of paracetamol on bronchial responsiveness and asthma control in adults with mild to moderate asthma. However, the study findings are limited by low power and the upper confidence interval limits did not rule out a clinically relevant adverse effect.

## STRENGTHS AND WEAKNESSES

- Randomised placebo-controlled trial
- Physiological, clinical and immunological outcome measures
- Powered to detect a marked effect on BHR

## KEY MESSAGES

### What is the key question?

Does regular paracetamol use result in worsening asthma severity?

### What is the bottom line?

Paracetamol use did not cause a marked increase in bronchial hyperresponsiveness or asthma control in adult asthma, although it was not possible to rule out a clinically relevant effect.

### Why read on?

This is the first randomised placebo-controlled trial to measure the effects of paracetamol in stable adult asthma. The study findings provide information on which the design of further studies can be based.

## INTRODUCTION

There is a growing body of evidence to suggest that paracetamol may play an important role as a risk factor for the development of asthma, and that increasing world-wide use may have contributed to the increasing global prevalence of asthma seen over the last 40 years.[1,2] Childhood asthma risk increases in the offspring of women who consume paracetamol during pregnancy,[3] and paracetamol use in the first 12 months of life is associated with an increased risk of wheezing at 3 years [4,5] and 6-7 years.[6] Cross-sectional surveys in children,[6] adolescents [7] and adults [8-11] consistently demonstrate an association between current paracetamol use and asthma in populations with widely differing lifestyles, standards of living, medical practice and availability of paracetamol. However, there is also evidence that these associations may, in part, be due to confounding by indication in some,[12-14] but not all cohort studies in childhood.[15] Cohort studies in adults have demonstrated that increasing frequency of paracetamol use is positively associated with newly-diagnosed (adult-onset) asthma.[16,17]

There is also evidence that paracetamol may increase the severity of asthma in those with the disease. This primarily comes from the only randomised controlled trial of the effect of paracetamol use for fever and asthma outcomes, in which asthmatic children experiencing a current febrile illness were randomised to receive either paracetamol or ibuprofen.[18] The children who received paracetamol were more likely to require an outpatient visit for asthma compared to children in the ibuprofen group. The increased risk with paracetamol was dose dependent and related to respiratory febrile illnesses rather than other causes of fever. In a case-control study which reported a dose-dependent association between paracetamol use and asthma, a progressively greater risk in those with more severe disease was noted, suggesting an effect on both causation and severity of the disease.[10]

The mounting epidemiological evidence, supported by several biologically plausible mechanisms [19-28] has led to repeated calls [2,5-7,13,29-32] for randomised controlled trials to be undertaken

1 to explore the relationship between paracetamol and asthma. This study is the first randomised  
2 controlled trial undertaken to investigate the effect of regular daily paracetamol on asthma severity  
3 in adult patients with asthma. It was powered to detect a one doubling dose change in PC<sub>20</sub>  
4 methacholine bronchial hyperresponsiveness (BHR). Markers of airways inflammation and  
5 systemic immunological responses were monitored to provide insight into possible mechanisms of  
6 action. The hypothesis was that regular paracetamol use would result in a worsening in BHR and  
7 asthma control.  
8  
9  
10  
11  
12  
13  
14  
15  
16  
17  
18  
19  
20  
21  
22  
23  
24  
25  
26  
27  
28  
29  
30  
31  
32  
33  
34  
35  
36  
37  
38  
39  
40  
41  
42  
43  
44  
45  
46  
47  
48  
49  
50  
51  
52  
53  
54  
55  
56  
57  
58  
59  
60

For peer review only

## METHODS

The study design was a double-blind, randomised, placebo-controlled, parallel group trial based in Wellington, New Zealand. The study methods are summarised with additional details provided in the supplementary appendix. The study was approved by the Central Regional Ethics Committee (CEN/08/12/070) and all participants gave written informed consent. The trial was registered on the Australian New Zealand Clinical Trials Registry (ACTRN12609000551291).

### Participants

Participants were identified from the Medical Research Institute of New Zealand (MRINZ) asthma register, general practitioner patient databases, and the general public through advertising. Inclusion criteria included age between 18 and 65 years, wheeze in the previous 12 months and a doctor's diagnosis of asthma, forced expiratory volume in 1 second (FEV<sub>1</sub>)  $\geq$ 70% predicted at screening and baseline and a PC<sub>20</sub> MCh (the provocation concentration of methacholine causing a 20% reduction in FEV<sub>1</sub>) of between 0.125 and 16 mg/ml at baseline. Exclusion criteria included regular use of theophylline, ipratropium bromide, tiotropium or leukotriene receptor antagonists in the previous 3 months, alanine aminotransferase (ALT) levels greater than 1.5 times the upper limit of normal at baseline, a history of liver disease or the current use of hepatotoxic drugs, an exacerbation of asthma within the previous two months requiring prednisone or nebulised bronchodilator, current or past cigarette smoking >10 pack years, history of sensitivity or allergy to paracetamol or current regular use of paracetamol, use of high-dose aspirin or non-steroidal anti-inflammatory drugs, history of alcoholism or current excessive alcohol intake, history of previous intentional overdose of paracetamol, previous suicide attempt or current unstable depression, body mass index <16 kg/m<sup>2</sup>, pregnant or breast-feeding women or women not using adequate contraception and participants unsuitable for BHR challenge testing in accordance with American Thoracic Society (ATS) criteria.[33]

### Interventions

1 Participants were randomised to receive one of two treatment regimens for 12 weeks. The  
2  
3 treatments were paracetamol 1g, administered as two 500mg tablets, or placebo administered as  
4  
5 two identically appearing tablets, taken twice daily. The paracetamol and placebo tablets were  
6  
7 supplied by Aspen Asia Pacific Ltd, Sydney, Australia.  
8  
9

### 10 11 **Randomisation**

12 A computer-generated randomisation schedule was generated by the study statistician and was  
13  
14 administered by the study pharmacists. It was necessary to randomise the participants prior to  
15  
16 their final eligibility screening visit (visit 2) to enable the study pharmacists adequate time to  
17  
18 prepare the study medication for dispensing at visit 2 following final determination of eligibility. If a  
19  
20 participant failed one of the eligibility criteria at visit 2, the randomised medication was not  
21  
22 dispensed and the participant was withdrawn from the study. The randomisation code was not re-  
23  
24 used.  
25  
26  
27

### 28 29 **Blinding**

30 Study investigators, participants, and participant health care providers were blinded through  
31  
32 provision of medication as identically appearing tablets in bottles, with neither the investigator  
33  
34 dispensing the medication or the participants aware of the allocated treatment.  
35  
36  
37  
38

### 39 40 **Design**

41 The trial involved four study clinic visits and between two and four additional blood tests over 13  
42  
43 weeks (Figure 1). A screening visit (visit 1) was held approximately one week prior to baseline and  
44  
45 consisted of a medical history and brief physical examination, pregnancy test where applicable,  
46  
47 bronchodilator reversibility testing, liver function screen and allergy skin prick tests (see online  
48  
49 supplement for details). A diary was used to record morning and evening peak expiratory flow  
50  
51 (PEF) values (prior to asthma medication use) for one week prior to the second visit. Participants  
52  
53 who met initial eligibility criteria were randomised at this stage, prior to final eligibility assessment  
54  
55 at visit 2.  
56  
57  
58  
59  
60



1  
2  
3  
4 At visit 2, designated the baseline visit, the Qoltech asthma control questionnaire (ACQ)[34] was  
5 administered and  $PEF_{var}$  (PEF variability measured as the amplitude as a percentage of the mean)  
6 calculated. Baseline assessments of  $FEV_1$  were undertaken using a Micro Medical Microlab  
7 spirometer (Micro Medical, Kent, UK) and Fractional exhaled Nitric Oxide (FeNO) was assessed  
8 using a NiOX Flex chemiluminescence analyser (Aerocrine AB, Stockholm, Sweden).  
9  
10 Methacholine (Methapharm, Ontario, Canada) challenge testing was undertaken via the two-  
11 minute tidal breathing dosing protocol recommended by the ATS,[33] as outlined in the online  
12 supplement. Participants who met all the eligibility criteria were then dispensed a six-week supply  
13 of randomised medication, a medication diary to record administered doses and a prescription for  
14 codeine phosphate for emergency pain relief during the trial period. These participants then  
15 underwent blood tests including full blood count (eosinophils), total serum immunoglobulin E (IgE),  
16 and serum cytokine levels (interferon (IFN)- $\gamma$ , interleukin (IL)-4, IL-5, IL-13) (see online supplement  
17 for details).  
18  
19  
20  
21  
22  
23  
24  
25  
26  
27  
28  
29  
30  
31

32 At visits 3 and 4, six and 12 weeks after baseline,  $FEV_1$ , ACQ, FeNO and blood tests were  
33 repeated and medication compliance checked via pill count and medication diary check (see online  
34 supplement for details). At the third visit, participants were given a further six-week supply of study  
35 medication, a second medication diary, and a diary to record morning and evening PEF values in  
36 the final intervention week. At the fourth and final visit, BHR testing was repeated. Liver function  
37 tests were monitored throughout the study (see online supplement for details).  
38  
39  
40  
41  
42  
43  
44  
45  
46

## 47 Outcomes

48 The primary outcome variable was  $PC_{20}$  MCh at 12 weeks, adjusted for baseline. Secondary  
49 outcome measures were  $FEV_1$ ,  $FEV_1$  % predicted, ACQ score and FeNO at six and 12 weeks, and  
50 the mean morning peak flow,  $PEF_{var}$ , and exacerbations of asthma (requiring a doctor's visit and  
51 need for prednisone or nebulised bronchodilator) at 12 weeks. Blood eosinophil, serum IgE, and  
52 serum cytokine (IFN- $\gamma$ , IL-4, IL-5 and IL-13) levels were measured at six and 12 weeks.  
53  
54  
55  
56  
57  
58  
59  
60

## Statistical Methods

The primary analysis method was ANCOVA. The logarithm base two PC<sub>20</sub> for methacholine at 12 weeks was the primary response variable, with the baseline logarithm base two PC<sub>20</sub> as a covariate, and a categorical variable for the paracetamol group. The difference in logarithm base two PC<sub>20</sub> was the doubling dose difference between the two randomised groups. Secondary outcome variables, including FEV<sub>1</sub>, FEV<sub>1</sub> % predicted, ACQ score, FeNO, mean morning peak flow and PEF<sub>var</sub> were also analyzed by ANCOVA. The distribution of FeNO, serum IgE and eosinophil count was skewed and normality assumptions for these variables were best met on the natural logarithm scale.

A risk difference and appropriate confidence intervals were calculated for the categorical variable, the number of participants with at least one asthma exacerbation. Simple t-tests were used to compare mean values for ALT, the logarithm transformed FeNO, eosinophil count and IgE by paracetamol or placebo group, as the latter three had skewed distributions. For those variables with a logarithm transformation, the exponent of the difference in logarithms was interpreted as the ratio of mean values.

The analysis was by intention to treat of randomised participants who passed the final eligibility screening and as a result received randomised treatment. No randomised participants who failed the final eligibility screen received randomised treatment or underwent any outcome assessments. For each individual analysis, a two-sided P value of 0.05 was used, with 95% confidence intervals for each estimate. We have not adjusted for multiple statistical testing.

## Sample Size

A sample size of 60 in each group has 80% power at the 5% level of significance to detect a difference of one doubling dose in PC<sub>20</sub> MCh between the groups, based on a standard deviation of 1.9.[35] To allow for the possibility of up to 10% of study participants withdrawing early from the study, a recruitment target of 66 participants was set for each group.

For peer review only

## RESULTS

Recruitment commenced in June 2009 and ended in September 2011. The planned study period of two years was extended by three months due to difficulties in recruitment. Figure 2 shows the flow of participants. There were 724 patients assessed for eligibility at phone screening and/or visit 1; of these, 338 failed to meet the inclusion criteria and 205 declined to participate (see online supplement). There were 181 participants randomised prior to visit 2 based on initial eligibility at visit 1; 91 to the paracetamol group and 92 to the placebo group. 53/91 participants allocated to the paracetamol group and 34/92 allocated to the placebo group were withdrawn at visit 2 as they either did not meet the inclusion/exclusion criteria ( $PC_{20} > 16\text{mg/ml}$ ,  $n=68$ ;  $PC_{20} < 0.125\text{mg/ml}$ ,  $n=3$ ;  $FEV_1 < 70\%$  predicted,  $n=6$ ; unable to perform spirometry,  $n=1$ ) or were lost to follow-up or withdrew consent ( $n=9$ ). No study medication was dispensed to the participants who were withdrawn at visit 2 (see online supplement).

Medication was dispensed to 94 participants who commenced the intervention phase following visit 2: 36 randomised to paracetamol and 58 to placebo. The characteristics of the subjects are shown in Table 1. The mean age of participants was 40 years and there were 59 female participants. Approximately 30% of study participants were prescribed inhaled corticosteroids and 18% prescribed long-acting beta agonist drugs. Around 90% of participants had positive skin prick tests to either cat, mixed grass or house dust mite. Participants had mild to moderate asthma, with a baseline ACQ score of 0.86 (SD 0.59). The baseline mean FeNO was 48.9 ppb (SD 41.3) and the mean  $FEV_1$  was 94% of predicted (SD 12.0). The baseline mean  $PC_{20}$  was 4.29 mg/ml (SD 4.54).

There were 85/94 participants who completed the study. Five participants were withdrawn from the paracetamol group; two withdrew at the participant's own discretion, one was excluded due to a raised ALT (119 IU/L), one was lost to follow-up and one was excluded due to intercurrent illness. Four participants were withdrawn from the placebo group; two were excluded due to a raised ALT

1  
2 (207 and 227 IU/L respectively), one withdrew at the participant's own discretion and one was lost  
3  
4 to follow-up.

### 8 **Primary Outcome Variable**

9  
10 At 12 weeks the mean (SD) logarithm base two PC<sub>20</sub> was 1.07 (2.36) in the control group (N=54)  
11 and 0.62 (2.09) in the paracetamol group (N=31). After controlling for baseline PC<sub>20</sub>, the difference  
12 (expressed as a doubling dose difference, paracetamol minus placebo) was not statistically  
13  
14 significant: -0.48 (95% CI -1.28 to 0.32), P=0.24 (Table 2).  
15  
16  
17  
18  
19

### 20 **Secondary Outcome Variables**

21  
22 There were no statistically significant differences in FEV<sub>1</sub>, FEV<sub>1</sub> % predicted, ACQ score, mean  
23 morning peak flow or PEF<sub>var</sub> between the control and paracetamol groups at Week 12 (Table 2) or  
24 in FEV<sub>1</sub> or ACQ score at Week 6 (Online Supplement). There were three asthma exacerbations in  
25 the placebo group and none in the paracetamol group, an absolute difference of 5.6% (95% CI -0.5  
26 to 11.7%). There was 93.2% compliance in the control group and 90.8% compliance in the  
27 paracetamol group when assessed by pill count and medication diaries, a difference of 2.4%, (95%  
28 CI -1.0 to 5.8). Serum paracetamol levels (greater than the 30 µmol/L threshold) were detectable  
29 in between 31.3 to 38.7% of participants in the paracetamol group and were undetectable in all  
30 participants in the placebo group between week 2 and week 12 of the study.  
31  
32  
33  
34  
35  
36  
37  
38  
39  
40  
41

42  
43 There were no statistically significant differences observed in log FeNO at Week 6 (see Online  
44 Supplement), or at Week 12, or in log eosinophil or log IgE levels between the two groups at week  
45 12 (Table 3). Only a proportion of participants had measurable levels of IFN-γ, IL-4, IL-5 and IL-13  
46 at baseline or at other times throughout the trial, precluding meaningful analysis (see online  
47 supplement). ALT levels were significantly higher in the paracetamol group, with a mean ALT of  
48 25.4 (SD 9.7) and 19.0 (SD 6.0) in the paracetamol and placebo groups respectively at visit 4,  
49 difference 6.3 (95% CI 2.9 to 9.7, p <0.001).  
50  
51  
52  
53  
54  
55  
56  
57  
58  
59  
60

## DISCUSSION

This double-blind, randomised, placebo-controlled, parallel group study found no statistically significant reduction in PC<sub>20</sub> with 12-weeks paracetamol treatment. However, the results did not rule out a clinically significant effect, with the 95% confidence interval containing the pre-specified difference of one doubling dose reduction in PC<sub>20</sub>. There were no significant differences observed in any of the pre-specified secondary outcome variables of asthma control, inflammatory or immunological markers.

This is the first reported randomised placebo-controlled trial of the effects of daily paracetamol in stable adult asthma. The only other published randomised controlled trial of paracetamol and asthma was the Boston University Fever Study.[18] Children randomised to the ibuprofen group had a reduced risk of having an outpatient visit for asthma during the 4 week study period (OR 0.56, 95% CI 0.34 to 0.95) compared with children in the paracetamol group. Because the study did not include a placebo treatment, it was not possible to determine whether the observed difference in morbidity according to treatment group was attributable to an increased risk with paracetamol or a decreased risk with ibuprofen.

There are several methodological issues relevant to the interpretation of our study findings. First, as enshrined in the Declaration of Helsinki [36] there is a requirement to study the least vulnerable populations wherever applicable. Most, but not all, of the putative adverse effects of paracetamol on asthma have been shown in observational studies of children and suggest that paracetamol may increase the risk of developing asthma.[1,2] However, as there is some data to suggest that regular paracetamol use may lead to a deterioration in asthma control in adults,[1,10] we opted to firstly examine the effects of paracetamol in adults with stable asthma.

Second, this trial was powered to determine whether there was an effect on BHR of at least one-doubling dose reduction in PC<sub>20</sub> MCh. Our ability to achieve the designated sample size completing

1 the study was affected by several factors. First, despite a rigorous recruitment campaign during  
2 which over 700 patients were screened, due to the inclusion and exclusion criteria employed to  
3 ensure participant safety, only 94 screened participants were dispensed randomised medication.  
4  
5 Secondly, variability in PC<sub>20</sub> from baseline to week 12 was larger than anticipated, with a pooled  
6 SD of 2.27 doubling doses compared to that used in the sample size calculation based on a SD of  
7 1.9, derived from previous studies.[35] Another factor which affected the study power was the  
8 requirement to randomise subjects prior to their final screening visit in order to allow the pharmacy  
9 adequate time for dispensing at visit 2, following final determination of eligibility. If the participant  
10 failed this final eligibility, the randomised medication was not dispensed, the participant was  
11 withdrawn from the study, and the randomisation code was not reused. By chance this resulted in  
12 a disparity between the proportion of participants receiving active or placebo study medication.  
13  
14

15 Compliance was high when measured via pill count, and although less than half of participants in  
16 the paracetamol group had measurable levels of paracetamol in the blood at the times tested  
17 throughout the study, this is likely to be due to the laboratory cut-off for a detectable paracetamol  
18 level (30 µmol/L). Following a 1g dose, participant blood levels may fall below this laboratory cut-  
19 off level in as little as 3 hours (given an paracetamol half-life of 2 hours and a peak plasma  
20 concentration 1 hour after administration of 80 µmol/L [37]).  
21  
22

23 Our 12-week dosing period was chosen based on evidence that regular, long-term use of  
24 paracetamol is associated with an increased risk of asthma in adults [9-11,16,17] and that chronic  
25 ingestion of therapeutic doses can reduce serum antioxidant capacity in as little as two weeks.[38]  
26 We had originally intended to use the maximum daily dose of 4g paracetamol, however chose to  
27 administer half this dose due to concerns of liver toxicity. These concerns were based on a  
28 previous clinical trial of paracetamol in which the incidence of ALT elevations more than three  
29 times the upper limit of normal in healthy participants taking 4g/day for 14 days was 31 to  
30 44%.[39] Our results showed no clinically significant liver function derangement with paracetamol  
31 administered at a dose of 2g/day for 12 weeks.  
32  
33  
34  
35  
36  
37  
38  
39  
40  
41  
42  
43  
44  
45  
46  
47  
48  
49  
50  
51  
52  
53  
54  
55  
56  
57  
58  
59  
60

1  
2  
3  
4 Whilst the study did not demonstrate a statistically significant effect of paracetamol on BHR to  
5 MCh, the results do not rule out a clinically significant effect, with the upper 95% confidence  
6 interval of a 1.28 doubling-dose worsening in BHR containing the pre-specified difference of one  
7 doubling-dose. Furthermore, our point estimate of a reduction in PC<sub>20</sub> of 0.48 of a doubling-dose  
8 could potentially be of major public health significance. As proposed by Mitchell,[40] a small shift to  
9 the left of the BHR curve in a population could lead to a relatively large increase in the prevalence  
10 of severe asthma. Relevant to the interpretation of our findings it has recently been calculated that  
11 a one half doubling dose increase in BHR increases the prevalence of moderate and severe BHR  
12 by about 30%.[41] Likewise, although the 9% increase in FeNO with paracetamol was not  
13 statistically significant, a change of this magnitude is considered clinically significant.[42] For  
14 FEV<sub>1</sub>, the point estimate was consistent with a lower value in the paracetamol group, however the  
15 difference was of uncertain clinical significance and was associated with wide confidence intervals.  
16  
17  
18  
19  
20  
21  
22  
23  
24  
25  
26  
27  
28  
29

30 No significant effect was seen on serum IgE or peripheral blood eosinophil levels. It was not  
31 possible to undertake any meaningful analysis of the cytokine measurements, due to the low  
32 numbers of participants with detectable levels, and as a result we were unable to determine if  
33 paracetamol influenced the Th1/Th2 balance. Another less recognised potential mechanism of  
34 action, which was not directly assessed in this study, relates to neurogenic inflammation of the  
35 airways through the stimulation of the transient receptor potential ankyrin-1 (TRPA-1) cation  
36 channel by NAPQI, the metabolite of paracetamol.[26] This pathway, which is activated following  
37 therapeutic doses of paracetamol, mediates a non-eosinophilic inflammatory response and has  
38 been implicated in the pathogenesis or provocation of asthma by isocyanates, aldehydes, cigarette  
39 smoke and chlorine.[43,44]  
40  
41  
42  
43  
44  
45  
46  
47  
48  
49  
50

51  
52  
53 Our findings provide information on which the design of further studies could be based. A trial of  
54 similar design, utilising the same duration and dose of paracetamol and with BHR testing to MCh  
55 as the primary outcome variable, based on the standard deviation derived from this study, would  
56  
57  
58  
59  
60



1  
2 require a sample size of approximately 650 to attain adequate power to detect a difference of 0.5  
3 doubling-doses. Alternatively, a study of short-term use of paracetamol at higher doses could be  
4 undertaken, to more closely replicate the common use of paracetamol for relief of fever or pain in  
5 self-limited illnesses. Based on our findings, a sample size of 140 would be adequate to determine  
6 a 0.5 doubling-dose difference in MCh BHR, and a 10% increase in FeNO, in a short-term study of  
7 cross-over design. Finally, our study investigated the effect of paracetamol on asthma severity and  
8 not whether paracetamol has a role in the pathogenesis of asthma. Testing this hypothesis would  
9 require a clinical trial in infants, which would raise ethical and practical issues regarding consent  
10 and the use of placebo for the management of pain or fever in young children. However given the  
11 common usage of paracetamol in all age groups including pregnancy and the global burden of  
12 asthma, we propose that randomised controlled trials are required to determine the effect of  
13 paracetamol use on the development of asthma in infancy and early childhood.  
14  
15  
16  
17  
18  
19  
20  
21  
22  
23  
24  
25  
26  
27

28 In conclusion, this study has shown no significant effect of 12 weeks of treatment with paracetamol  
29 at half the maximum therapeutic daily dose on BHR and asthma control in adults with well  
30 controlled asthma. Whilst this outcome provides some reassurance that regular paracetamol use  
31 has no marked deleterious effect in adult asthma, further adequately powered studies are needed  
32 before the safety of paracetamol for patients with asthma is assured. Furthermore, the study  
33 findings do not preclude an effect of paracetamol on the development of asthma in infancy,  
34 childhood or adult life.  
35  
36  
37  
38  
39  
40  
41  
42  
43  
44  
45  
46  
47  
48  
49  
50  
51  
52  
53  
54  
55  
56  
57  
58  
59  
60

**COMPETING INTERESTS**

R Beasley has been a member of the GlaxoSmithKline (NZ) Advisory Board, and received research grants, payment for lectures or support to attend meetings from GlaxoSmithKline, a manufacturer of paracetamol.

**FUNDING**

S Eysers is a Health Research Council Clinical Research Training Fellow. Funding for the study was through research grants from the Health Research Council of New Zealand, the Wellington Medical Research Foundation, the Asthma and Respiratory Foundation of New Zealand, and the University of Otago.

**ADDITIONAL DATA**

There are no additional data available.

**CONTRIBUTORSHIP STATEMENT:**

S Eysers was principal investigator and contributed to study planning, study conduct, data analysis and manuscript preparation. K Perrin contributed to study planning, study conduct and manuscript preparation, M Williams, S Jefferies and M Patel contributed to study conduct, M Weatherall contributed to randomisation, statistical analysis and preparation of manuscript, R Siebers contributed to blood analysis and preparation of manuscript, J Crane contributed to study planning and manuscript preparation, J Travers and P Shirtcliffe were safety investigators and R Beasley contributed to study planning, study conduct, data analysis and manuscript preparation.

## REFERENCES

1. Farquhar H, Stewart A, Mitchell E, et al. The role of paracetamol in the pathogenesis of asthma. *Clin Exp Allergy* 2010;**40**:32-41.
2. McBride JT. The Association of Acetaminophen and Asthma Prevalence and Severity. *Pediatrics* 2011;**128**:1181-5.
3. Eyers S, Weatherall M, Jefferies S, Beasley R. Paracetamol in pregnancy and the risk of wheezing in offspring: a systematic review and meta-analysis. *Clin Exp Allergy* 2011;**41**:482-9.
4. Shaheen SO, Newson RB, Sherriff A, et al. Paracetamol use in pregnancy and wheezing in early childhood. *Thorax* 2002;**57**:958-63.
5. Amberbir A, Medhin G, Alem A, et al. The role of acetaminophen and geohelminth infection on the incidence of wheeze and eczema: a longitudinal birth-cohort study. *Am J Respir Crit Care Med* 2010;**183**:165-70.
6. Beasley R, Clayton T, Crane J, et al. Association between paracetamol use in infancy and childhood, and risk of asthma, rhinoconjunctivitis, and eczema in children aged 6-7 years: analysis from Phase Three of the ISAAC programme. *Lancet* 2008;**372**:1039-48.
7. Beasley RW, Clayton TO, Crane J, et al. Acetaminophen use and risk of asthma, rhinoconjunctivitis and eczema in adolescents: ISAAC Phase Three. *Am J Respir Crit Care Med* 2011;**183**:171-8.
8. Davey G, Berhane Y, Duncan P, et al. Use of acetaminophen and the risk of self-reported allergic symptoms and skin sensitization in Butajira, Ethiopia. *J Allergy Clin Immunol* 2005;**116**:863-8.
9. McKeever TM, Lewis SA, Smit HA, et al. The association of acetaminophen, aspirin, and ibuprofen with respiratory disease and lung function. *Am J Respir Crit Care Med* 2005;**171**:966-71.
10. Shaheen SO, Sterne JA, Songhurst CE, Burney PG. Frequent paracetamol use and asthma in adults. *Thorax* 2000;**55**:266-70.

- 1 11. Shaheen S, Potts J, Gnatiuc L, et al. The relation between paracetamol use and asthma: a  
2 GA2LEN European case-control study. *Eur Respir J* 2008;**32**:1231-6.
- 3  
4  
5 12. Schnabel E, Heinrich J. Respiratory tract infections and not paracetamol medication during  
6 infancy are associated with asthma development in childhood. *J Allergy Clin Immunol*  
7  
8 2010;**126**:1071-3.
- 9  
10  
11 13. Tapiainen T, Dunder T, Mottonen M, et al. Adolescents with asthma or atopic eczema have  
12 more febrile days in early childhood: a possible explanation for the connection between  
13 paracetamol and asthma? *J Allergy Clin Immunol* 2010;**125**:751-2.
- 14  
15  
16 14. Lowe AJ, Carlin JB, Bennett CM, et al. Paracetamol use in early life and asthma:  
17 prospective birth cohort study. *BMJ* 2010;**341**:c4616.
- 18  
19  
20 15. Kreiner-Møller E, Sevelsted A, Vissing NH, et al. Infant acetaminophen use associates with  
21 early asthmatic symptoms independently of respiratory tract infections: The Copenhagen  
22 Prospective Study on Asthma in Childhood 2000 (COPSAC<sub>2000</sub>) cohort. *J Allergy Clin*  
23  
24  
25  
26  
27  
28  
29  
30  
31 16. Barr RG, Wentowski CC, Curhan GC, et al. Prospective study of acetaminophen use and  
32 newly diagnosed asthma among women. *Am J Respir Crit Care Med* 2004;**169**:836-41.
- 33  
34  
35 17. Thomsen SF, Kyvik KO, Skadhauge L, et al. Intake of paracetamol and risk of asthma in  
36 adults. *J Asthma* 2008;**45**:675-6.
- 37  
38  
39 18. Lesko SM, Louik C, Vezina RM, Mitchell AA. Asthma morbidity after the short-term use of  
40 ibuprofen in children. *Pediatrics* 2002;**109**:E20.
- 41  
42  
43 19. Rahman I, MacNee W. Oxidative stress and regulation of glutathione in lung inflammation.  
44  
45  
46  
47  
48 20. Chen TS, Richie JP Jr, Lang CA. Life span profiles of glutathione and acetaminophen  
49 detoxification. *Drug Metab Dispos* 1990;**18**:882-7.
- 50  
51  
52 21. Dimova S, Hoet P, Dinsdale D, Nemery B. Acetaminophen decreases intracellular  
53 glutathione levels and modulates cytokine production in human alveolar macrophages and  
54 Type II pneumocytes in vitro. *Int J Biochem Cell Biol* 2005;**37**:1727-37.
- 55  
56  
57  
58  
59  
60

- 1  
2  
3  
4  
5  
6  
7  
8  
9  
10  
11  
12  
13  
14  
15  
16  
17  
18  
19  
20  
21  
22  
23  
24  
25  
26  
27  
28  
29  
30  
31  
32  
33  
34  
35  
36  
37  
38  
39  
40  
41  
42  
43  
44  
45  
46  
47  
48  
49  
50  
51  
52  
53  
54  
55  
56  
57  
58  
59  
60
22. Kozer E, Evans S, Barr J, et al. Glutathione, glutathione-dependent enzymes and antioxidant status in erythrocytes from children treated with high-dose paracetamol. *Br J Clin Pharmacol* 2003;**55**:234-40.
23. Micheli L, Cerretani D, Fiaschi AI, et al. Effect of acetaminophen on glutathione levels in rat testis and lung. *Environ Health Perspect* 1994;**102(Suppl 9)**:63-4.
24. Eneli I, Sadri K, Camargo C Jr, Barr RG. Acetaminophen and the risk of asthma: the epidemiologic and pathophysiologic evidence. *Chest* 2005;**127**:604-12.
25. Lenney W, Fryer AA. The genetics of asthma: are the glutathione S-transferases serious players? *Clin Exp Allergy* 2007;**37**:1124-6.
26. Nassini R, Materazzi S, Andre E, et al. Acetaminophen, via its reactive metabolite N-acetyl-p-benzo-quinoneimine and transient receptor potential ankyrin-1 stimulation, causes neurogenic inflammation in the airways and other tissues in rodents. *FASEB J* 2010;**24**:4904-16.
27. Peterson JD, Herzenberg LA, Vasquez K, Waltenbaugh C. Glutathione levels in antigen-presenting cells modulate Th1 versus Th2 response patterns. *Proc Natl Acad Sci USA* 1998;**95**:3071-6.
28. Prymula R, Siegrist CA, Chlibek R, et al. Effect of prophylactic paracetamol administration at time of vaccination on febrile reactions and antibody responses in children: two open-label, randomised controlled trials. *Lancet* 2009;**374**:1339-50.
29. Barr RG. Does paracetamol cause asthma in children? Time to remove the guesswork. *Lancet* 2008;**372**:1011-2.
30. Farquhar H, Crane J, Mitchell EA, et al. The acetaminophen and asthma hypothesis 10 years on: A case to answer. *J Allergy Clin Immunol* 2009;**124**:649-51.
31. Johnson CC, Ownby DR. Have the efforts to prevent aspirin-related Reye's syndrome fuelled an increase in asthma? *Clin Exp Allergy* 2011;**41**:296-8.
32. Holgate ST. The acetaminophen enigma in asthma. *Am J Respir Crit Care Med* 2011;**183**:147-8.

- 1  
2  
3  
4  
5  
6  
7  
8  
9  
10  
11  
12  
13  
14  
15  
16  
17  
18  
19  
20  
21  
22  
23  
24  
25  
26  
27  
28  
29  
30  
31  
32  
33  
34  
35  
36  
37  
38  
39  
40  
41  
42  
43  
44  
45  
46  
47  
48  
49  
50  
51  
52  
53  
54  
55  
56  
57  
58  
59  
60
33. American Thoracic Society. Guidelines for Methacholine and Exercise Challenge Testing 1999. *Am J Respir Crit Care Med* 2000;**161**:309-29.
34. Juniper EF, O'Byrne PM, Guyatt GH, et al. Development and validation of a questionnaire to measure asthma control. *Eur Respir J* 1999;**14**:902-7.
35. Chinn S, Schouten JP. Reproducibility of non-specific bronchial challenge in adults: implications for design, analysis and interpretation of clinical and epidemiological studies. *Thorax* 2005;**60**:395-400.
36. World Medical Association: Declaration of Helsinki Ethical Principles for Medical Research Involving Human Subjects *JAMA* 2000;**284**:3043-5.
37. Gibb IA, Anderson BJ. Paracetamol (acetaminophen) pharmacodynamics: interpreting the plasma concentration. *Arch Dis Child* 2008;**93**:241-7.
38. Nuttall SL, Khan JN, Thorpe GH, et al. The impact of therapeutic doses of paracetamol on serum total antioxidant capacity. *J Clin Pharm Ther* 2003;**28**:289-94.
39. Watkins PB, Kaplowitz N, Slattery JT, et al. Aminotransferase elevations in healthy adults receiving 4 grams of acetaminophen daily – A randomized controlled trial. *JAMA* 2006;**296**:87-93.
40. Mitchell EA. Is current treatment increasing asthma mortality and morbidity? *Thorax* 1989;**44**:81-4.
41. Weatherall M, Fingleton J, Eyers S, Beasley R. A half doubling dose change in bronchial hyperresponsiveness in a population represents an important difference. *Trans Resp Med* 2013;doi:10.1186/2213-0802-1-4.
42. Lim KG, Mottram C. The use of fraction of exhaled nitric oxide in pulmonary practice. *Chest* 2008;**133**:1232-42.
43. Bautista DM, Jordt SE, Nikai T, et al. TRPA1 mediates the inflammatory actions of environmental irritants and proalgesic agents. *Cell* 2006;**124**:1269-82.
44. Caceres AI, Brackmann M, Elia MD, et al. A sensory neuronal ion channel essential for airway inflammation and hyperreactivity in asthma. *Proc Natl Acad Sci USA* 2009;**106**:9099-104.

**Table 1: Characteristics of participants who received randomised treatment**

|                                                | Paracetamol Group | Placebo Group     |
|------------------------------------------------|-------------------|-------------------|
| <b>Number</b>                                  | 36                | 58                |
| <b>Demographic</b>                             |                   |                   |
| Mean age, y $\pm$ SD                           | 41.5 $\pm$ 13.9   | 38.3 $\pm$ 12.5   |
| Male sex, No. (%)                              | 15 (41.7)         | 20 (34.5)         |
| Weight, Kg $\pm$ SD                            | 75.1 $\pm$ 16.7   | 77.4 $\pm$ 17.8   |
| Height, m $\pm$ SD                             | 1.7 $\pm$ 0.1     | 1.69 $\pm$ 0.11   |
| BMI, Kg/m <sup>2</sup> $\pm$ SD                | 25.9 $\pm$ 4.2    | 27.1 $\pm$ 5.8    |
| <b>Medication Use</b>                          |                   |                   |
| ICS, No. (%)                                   | 9 (25%)           | 20 (34%)          |
| SABA, No. (%)                                  | 33 (92%)          | 55 (95%)          |
| LABA, No. (%)                                  | 9 (25%)           | 8 (14%)           |
| <b>Defining Study Population</b>               |                   |                   |
| FEV <sub>1</sub> , L $\pm$ SD                  | 3.09 $\pm$ 0.78   | 3.12 $\pm$ 0.87   |
| FEV <sub>1</sub> % Predicted $\pm$ SD          | 94.1 $\pm$ 11.3   | 94.0 $\pm$ 12.4   |
| Bronchodilator Reversibility (%)               | 9.1 $\pm$ 6.0     | 7.8 $\pm$ 5.5     |
| SPT Cat pelt, No. (% +ve)                      | 20 (55.6)         | 33 (57.9)         |
| SPT D. pteronyssinus No. (% +ve)               | 30 (83.3)         | 52 (91.2)         |
| SPT Mixed grass, No. (% +ve)                   | 25 (69.4)         | 38 (66.7)         |
| SPT at least one positive, No. (% +ve)         | 33 (91.7)         | 55 (96.5)         |
| <b>Clinical and Physiological Measurements</b> |                   |                   |
| PC <sub>20</sub> MCh, mg/ml $\pm$ SD           | 4.14 $\pm$ 4.42   | 4.39 $\pm$ 4.66   |
| Mean morning peak flow, L/min $\pm$ SD         | 424.0 $\pm$ 83.8  | 419.5 $\pm$ 92.3  |
| PEF <sub>var</sub> , %, $\pm$ SD               | 19.0 $\pm$ 9.3    | 22.2 $\pm$ 10.5   |
| ACQ Score $\pm$ SD                             | 0.93 $\pm$ 0.63   | 0.82 $\pm$ 0.56   |
| <b>Inflammation and Immunology</b>             |                   |                   |
| FeNO, ppb $\pm$ SD                             | 44.9 $\pm$ 39.2   | 51.3 $\pm$ 42.6   |
| Eosinophils, x 10 <sup>9</sup> /L, $\pm$ SD    | 0.26 $\pm$ 0.12   | 0.32 $\pm$ 0.17   |
| IgE, kU/L, $\pm$ SD                            | 518.4 $\pm$ 705.7 | 480.4 $\pm$ 914.0 |

**Abbreviations:** BMI = Body mass index; ICS = Inhaled corticosteroid; SABA = Short-acting beta agonist; LABA = Long-acting beta agonist; FEV<sub>1</sub> = Forced expiratory volume in 1 second; SPT = Skin prick test; PC<sub>20</sub> MCh = Provocation concentration of methacholine causing a 20% fall in FEV<sub>1</sub>; PEF<sub>var</sub> = Peak flow variability; ACQ = Asthma Control Questionnaire; FeNO = Fractional exhaled nitric oxide; IgE = Immunoglobulin E

**Table 2: Effect of paracetamol use on BHR, lung function and asthma control**

|                                   | BASELINE            |                 | WEEK 12             |                 | Difference<br>(adjusted for<br>baseline) |
|-----------------------------------|---------------------|-----------------|---------------------|-----------------|------------------------------------------|
|                                   | Paracetamol<br>N=36 | Placebo<br>N=58 | Paracetamol<br>N=31 | Placebo<br>N=54 |                                          |
| Log 2 PC <sub>20</sub> (mg/ml)    | 1.30<br>(1.50)      | 1.09<br>(1.96)  | 0.62<br>(2.09)      | 1.07<br>(2.36)  | -0.48<br>(-1.28 to 0.32)<br>P=0.24†      |
| FEV <sub>1</sub> (L)              | 3.06<br>(0.73)      | 3.05<br>(0.83)  | 3.01<br>(0.74)      | 3.07<br>(0.86)  | -0.07<br>(-0.15 to 0.01)<br>P=0.08       |
| ACQ score                         | 0.81<br>(0.47)      | 0.93<br>(0.59)  | 0.88<br>(0.56)      | 1.03<br>(0.71)  | -0.04<br>(-0.27 to 0.18)<br>P=0.71       |
| Mean morning peak flow<br>(L/min) | 424.0<br>(83.8)     | 419.5<br>(92.3) | 417.1<br>(82.3)     | 417.5<br>(85.9) | -8.6<br>(-26.7 to 9.5)<br>P=0.35         |
| PEF <sub>var</sub> (%)            | 19.0<br>(9.3)       | 22.2<br>(10.5)  | 20.4<br>(10.3)      | 21.7<br>(11.7)  | 0.21<br>(-4.3 to 4.8)<br>P=0.93          |

Numbers are mean (SD)

**Abbreviations:**

PC<sub>20</sub> = Provocation concentration of methacholine causing a 20% fall in FEV<sub>1</sub>; FEV<sub>1</sub> = Forced expiratory volume in one second;

PEF<sub>var</sub> = PEF variability (measured as amplitude as a percentage of the mean); ACQ = Asthma Control Questionnaire;

† = Difference in doubling doses



**Table 3: Effect of paracetamol use on FeNO, blood eosinophil count and serum IgE**

|                                       | BASELINE            |                 | WEEK 12             |                 | Difference<br>(adjusted for<br>baseline) |
|---------------------------------------|---------------------|-----------------|---------------------|-----------------|------------------------------------------|
|                                       | Paracetamol<br>N=36 | Placebo<br>N=58 | Paracetamol<br>N=31 | Placebo<br>N=54 |                                          |
| Log FeNO (ppb)                        | 3.53<br>(0.71)      | 3.66<br>(0.78)  | 3.69<br>(0.70)      | 3.65<br>(0.76)  | 0.09<br>(-0.097 to 0.27)<br>P=0.36       |
| Log eosinophils (x10 <sup>9</sup> /L) | -1.41<br>(0.47)     | -1.27<br>(0.53) | -1.33<br>(0.54)     | -1.32<br>(0.58) | -0.056<br>(-0.25 to 0.14)<br>P=0.57      |
| Log IgE (kU/L)                        | 5.28<br>(1.52)      | 5.29<br>(1.30)  | 5.02<br>(1.56)      | 5.20<br>(1.37)  | 0.098<br>(0.009 to 0.21)<br>P=0.073      |

**Abbreviations:**

FeNO = Fractional exhaled nitric oxide; IgE = Immunoglobulin E

1  
2  
3  
4  
5  
6  
7  
8  
9  
10  
11  
12  
13  
14  
15  
16  
17  
18  
19  
20  
21  
22  
23  
24  
25  
26  
27  
28  
29  
30  
31  
32  
33  
34  
35  
36  
37  
38  
39  
40  
41  
42  
43  
44  
45  
46  
47  
48  
49  
50  
51  
52  
53  
54  
55  
56  
57  
58  
59  
60

## FIGURE LEGENDS

### Figure 1:

Study design flow chart

**Abbreviations:** SPT = Skin prick test; Preg test = pregnancy test; FEV<sub>1</sub>/FVC = Forced expiratory volume in 1 second/forced vital capacity; BHR = bronchial hyperresponsiveness testing; ACQ = Asthma Control Questionnaire; LFT = liver function test; FeNO = Fractional exhaled nitric oxide; IgE = Immunoglobulin E; FBC = full blood count

### Figure 2:

CONSORT participant flow diagram

1  
2  
3  
4  
5  
6  
7  
8  
9  
10  
11  
12  
13  
14  
15  
16  
17  
18  
19  
20  
21  
22  
23  
24  
25  
26  
27  
28  
29  
30  
31  
32  
33  
34  
35  
36  
37  
38  
39  
40  
41  
42  
43  
44  
45  
46  
47  
48  
49  
50  
51  
52  
53  
54  
55  
56  
57  
58  
59  
60

Figure 1:

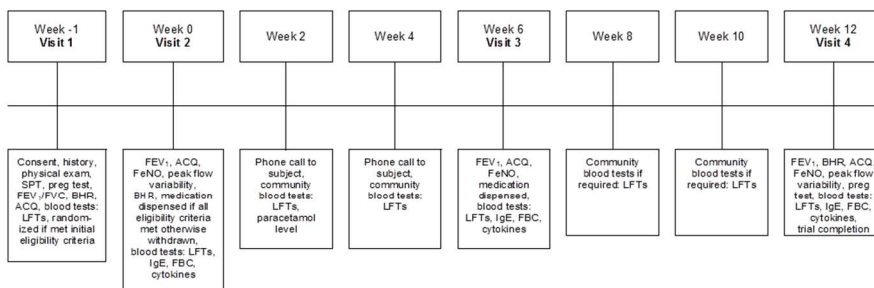

296x209mm (300 x 300 DPI)

view only

1  
2  
3  
4  
5  
6  
7  
8  
9  
10  
11  
12  
13  
14  
15  
16  
17  
18  
19  
20  
21  
22  
23  
24  
25  
26  
27  
28  
29  
30  
31  
32  
33  
34  
35  
36  
37  
38  
39  
40  
41  
42  
43  
44  
45  
46  
47  
48  
49  
50  
51  
52  
53  
54  
55  
56  
57  
58  
59  
60

Figure 2:

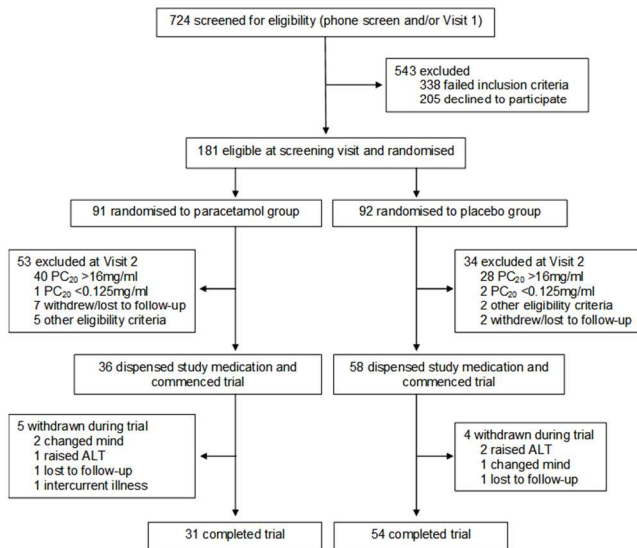

296x209mm (300 x 300 DPI)

view only

**ONLINE SUPPLEMENT****RANDOMISED PLACEBO CONTROLLED STUDY OF THE EFFECT OF  
PARACETAMOL ON ASTHMA SEVERITY**

<sup>1,2,3</sup>Sally Evers, <sup>1</sup>Mathew Williams, <sup>1,2</sup>Sarah Jefferies, <sup>1,2</sup>Kyle Perrin

<sup>2,3</sup>Mark Weatherall, <sup>3</sup>Rob Siebers, <sup>3</sup>Julian Crane, <sup>1,2</sup>Mitesh Patel,

<sup>1</sup>Justin Travers, <sup>1,2</sup>Philippa Shirtcliffe, <sup>1,2</sup>Richard Beasley

<sup>1</sup>Medical Research Institute of New Zealand, Wellington, New Zealand

<sup>2</sup>Capital & Coast District Health Board, Wellington, New Zealand

<sup>3</sup>University of Otago Wellington, Wellington, New Zealand

## METHODOLOGY

### Randomisation

A computer-generated randomisation schedule was generated by the study statistician and was administered by the study pharmacists. It was necessary to randomise the subjects prior to their final eligibility screening visit (visit 2) to enable the study pharmacists adequate time to prepare the study medication for dispensing at visit 2 following final determination of eligibility. Pharmacists received notification from the study investigators that a participant was due to attend visit 2, and assigned the appropriate treatment group to the participant based on the randomisation schedule. Allocated medication was then delivered to the MRINZ research offices in labelled medication bottles, ready for dispensing to study participants at the end of visit 2 if they were eligible for the study. If a participant failed one of the eligibility criteria at visit 2, the randomised medication was not dispensed and the participant was withdrawn from the study. The randomisation code was not re-used.

### Skin Prick Testing

Skin prick testing was undertaken to grass (grass mix #7, Hollister Stier Laboratories, USA), house dust mite (*Dermatophagoides pteronyssinus*, Hollister Stier Laboratories, USA), cat pelt (Stallergenes Laboratories, France), and positive (histamine) and negative controls (Hollister Stier Laboratories, USA), performed in accordance with Australasian Society of Clinical Immunology and Allergy (ASCIA) guidelines (Australasian Society of Clinical Immunology and Allergy 2006 (Revised March 2009)).

### Methacholine Challenge Testing

Participants were asked to withhold long-acting beta-agonists (LABAs) for 48 hours and short-acting beta-agonists (SABAs) and food or drink containing caffeine for eight hours prior to BHR testing. Methacholine (provocholine) was sourced from Methapharm Inc

(Ontario, Canada) as 1280mg vials, and was diluted with normal saline in a sterile manner, and refrigerated at a concentration of 128mg/ml for a period of up to three months. Methacholine was further diluted for each individual challenge test into doubling concentrations of 0.0125, 0.03, 0.06, 0.125, 0.05, 1, 2, 4, 8, 16, and 32mg/ml and left to warm to room temperature for at least 30 minutes prior to each test. An English Wright nebuliser (Roxon Meditec, Montreal, Canada) was used to deliver the methacholine dose. Basic spirometry was performed prior to challenge testing, and a saline (diluent) dose was given prior to the first methacholine dose. At each inhaled dose, the subject was asked to breath normally through the mouthpiece (with nose clip in place) for two minutes, after which time FEV<sub>1</sub> was measured at 30s and 90s. The next concentration of methacholine was then administered within 5 minutes of the original dose commencement. If FEV<sub>1</sub> fell by  $\geq 20\%$  from baseline (or if subject finished all concentrations without a drop in FEV<sub>1</sub>), no further medication was given and nebulised salbutamol (5mg/2.5ml) was administered immediately, followed by a 10-minute rest period. The subject was monitored and salbutamol nebuliser repeated if necessary until FEV<sub>1</sub> was within 10% of post-saline baseline. PC20, defined as the provocation concentration of inhaled methacholine required to produce a 20% reduction in FEV<sub>1</sub> was calculated via the formula:

$$\text{Logarithmic PC20} = \text{Antilog} \left[ \frac{(20-R1)(\log C2 - \log C1)}{(R2-R1) + \log C1} \right]$$

where C1 is the methacholine concentration producing less than a 20% Fall in FEV<sub>1</sub> and C2 is that producing a greater than 20% fall in FEV<sub>1</sub>. R1 and R2 are the percent FEV<sub>1</sub> reductions produced by C1 and C2 respectively (Cockcroft, Murdock et al. 1983).

### **Liver Function Tests**

Liver function tests included alanine aminotransferase (ALT), alkaline phosphatase (ALP), bilirubin, albumin, total protein and gamma-glutamyl transferase (GGT). Any

1  
2 participant who developed an elevation in ALT of greater than three times the upper limit  
3  
4 of normal during the study period was withdrawn from the trial. Blood tests to monitor liver  
5  
6 function were undertaken at two and four weeks after randomisation and were  
7  
8 accompanied by a phone call to the participant to monitor adverse events. Participants  
9  
10 who experienced a rise in ALT two to three times the upper limit of normal during the first  
11  
12 six weeks of the study were required to have additional blood tests to monitor liver  
13  
14 function eight and 10 weeks after randomisation. In order to maintain investigator  
15  
16 blinding, results of liver function tests were kept from the study investigators and viewed  
17  
18 only by the allocated safety data reviewers (JT and PS). If further blood tests were  
19  
20 required at weeks eight and 10, contact was made with the participant by the safety  
21  
22 reviewer directly so as to maintain investigator blinding. If, during the course of the study,  
23  
24 any participant was found to have abnormal liver function which required their withdrawal  
25  
26 from the study, the safety investigator unblinded the participant in order to inform their  
27  
28 ongoing management and notified their health care provider.  
29  
30  
31  
32  
33

### 34 **Cytokine Measurement**

35  
36 Concentrations of IFN-  $\gamma$ , IL-4, IL-5 and IL-13 were measured by ELISA (Quantikine, R&D  
37  
38 Systems, Minneapolis, MN), according to the manufacturer's protocols. The ELISA  
39  
40 minimum detectable level for IFN-  $\gamma$  was 12.5 pg/ml, for IL-4 was 27.7 pg/ml, for IL-5 was  
41  
42 3.5 pg/ml and for IL-13 was 55.3 pg/ml.  
43  
44  
45  
46  
47

### 48 **Medication Compliance Monitoring**

49  
50 Compliance with study medication was determined by a review of the medication diary, a  
51  
52 count of the units of medication returned at the end of the first and second 6-week study  
53  
54 period, and blood paracetamol levels taken at weeks 2, 6 and 12.  
55  
56  
57

58  
59 At visit 3 and 4, participants returned their medication diary and any remaining study  
60  
medication from the first or second 6-week period of the study. All participants were given



1  
2 188 tablets of study medication at visit 2 and visit 3, which equated to 6 weeks of fully  
3  
4 compliant medication dosing and one extra week in case of a delay in follow-up. The  
5  
6 number of days that the participant had been randomised, and therefore the number of  
7  
8 doses of study medication expected to have been consumed over that time period were  
9  
10 calculated based on the entries in the medication diary. The remaining tablets of study  
11  
12 medication were then counted and were compared with the number of tablets expected to  
13  
14 be returned.  
15  
16  
17  
18  
19  
20  
21  
22  
23  
24  
25  
26  
27  
28  
29  
30  
31  
32  
33  
34  
35  
36  
37  
38  
39  
40  
41  
42  
43  
44  
45  
46  
47  
48  
49  
50  
51  
52  
53  
54  
55  
56  
57  
58  
59  
60

For peer review only

**References**

Australasian Society of Clinical Immunology and Allergy. Skin Prick Testing for the Diagnosis of Allergic Disease, A Manual for Practitioners. 2006 (Revised March 2009).

Cockcroft DW, Murdock KY, et al. Determination of histamine PC20. Comparison of linear and logarithmic interpolation. *Chest* 1983;**84**:505-6

For peer review only

**Table E1: Participant recruitment failures****Excluded at Phone Screen (n=486)**

|     |                                                                                                                                                    |
|-----|----------------------------------------------------------------------------------------------------------------------------------------------------|
| 200 | Declined to participate                                                                                                                            |
| 56  | Smoker/Ex-smoker                                                                                                                                   |
| 39  | Contraindication to trial/paracetamol (incl: planned surgery, use of contraindicated meds, chronic pain conditions, allergy to NSAIDS/paracetamol) |
| 37  | Asthma too severe                                                                                                                                  |
| 35  | Currently using regular paracetamol                                                                                                                |
| 35  | Asthma too mild/no asthma                                                                                                                          |
| 34  | Unable to travel to study site                                                                                                                     |
| 18  | History suicide attempt/current depression                                                                                                         |
| 10  | Breastfeeding, pregnant, no contraception                                                                                                          |
| 8   | Trial period ended                                                                                                                                 |
| 7   | History of liver disease                                                                                                                           |
| 6   | Age outside range                                                                                                                                  |
| 1   | High weekly alcohol intake                                                                                                                         |

**Excluded at Visit 1 (n=57)**

|    |                                                                                                                                                    |
|----|----------------------------------------------------------------------------------------------------------------------------------------------------|
| 19 | FEV <sub>1</sub> <70% predicted                                                                                                                    |
| 11 | Raised ALT                                                                                                                                         |
| 10 | History suicide attempt/current depression                                                                                                         |
| 5  | Lost to follow up/withdrew consent                                                                                                                 |
| 4  | Smoker/ex-smoker>10py                                                                                                                              |
| 3  | Contraindication to trial/paracetamol (incl: planned surgery, use of contraindicated meds, chronic pain conditions, allergy to NSAIDS/paracetamol) |
| 2  | High weekly alcohol intake                                                                                                                         |
| 1  | No contraception                                                                                                                                   |
| 1  | High blood pressure                                                                                                                                |
| 1  | Age outside range                                                                                                                                  |

**Excluded at Visit 2 (n=87)**

|    |                                    |
|----|------------------------------------|
| 68 | PC <sub>20</sub> > 16 mg/ml        |
| 9  | Lost to follow up/withdrew consent |
| 7  | FEV <sub>1</sub> < 70% predicted   |
| 3  | PC <sub>20</sub> < 0.0125 mg/ml    |

Table E2: Participants with detectable levels of cytokines

| Variable (detectable level)                 | N/N (%)      |              |
|---------------------------------------------|--------------|--------------|
|                                             | Paracetamol  | Placebo      |
| <b>IFN-<math>\gamma</math> (12.5 pg/ml)</b> |              |              |
| Visit 2                                     | 21/36 (58.3) | 33/58 (56.9) |
| Visit 3                                     | 25/29 (86.2) | 40/55 (72.7) |
| Visit 4                                     | 26/31 (83.9) | 44/53 (83.0) |
| <b>IL-4 (27.7 pg/ml)</b>                    |              |              |
| Visit 2                                     | 1/36 (2.8)   | 3/58 (5.2)   |
| Visit 3                                     | 4/29 (13.8)  | 1/55 (1.8)   |
| Visit 4                                     | 2/31 (6.5)   | 2/53 (3.8)   |
| <b>IL-5 (3.5 pg/ml)</b>                     |              |              |
| Visit 2                                     | 1/36 (2.8)   | 2/58 (3.5)   |
| Visit 3                                     | 3/29 (10.3)  | 4/55 (7.8)   |
| Visit 4                                     | 3/31 (9.7)   | 0/53 (0)     |
| <b>IL-13 (55.3 pg/ml)</b>                   |              |              |
| Visit 2                                     | 0/36 (0)     | 4/58 (6.9)   |
| Visit 3                                     | 1/29 (3.5)   | 3/55 (5.5)   |
| Visit 4                                     | 1/31 (3.2)   | 7/53 (13.2)  |

**Abbreviations:** IFN- $\gamma$  = Interferon gamma; IL-4/5/13 = Interleukin 4/5/13

**Table E3: Effect of paracetamol use on BHR, lung function and asthma control**

|                      | BASELINE            |                 | WEEK 6              |                 | Difference<br>(adjusted for<br>baseline) |
|----------------------|---------------------|-----------------|---------------------|-----------------|------------------------------------------|
|                      | Paracetamol<br>N=36 | Placebo<br>N=58 | Paracetamol<br>N=32 | Placebo<br>N=55 |                                          |
| FEV <sub>1</sub> (L) | 3.06<br>(0.73)      | 3.05<br>(0.83)  | 3.08<br>(0.78)      | 3.13<br>(0.83)  | -0.03<br>(-0.14 to 0.08)<br>P=0.54       |
| ACQ score            | 0.81<br>(0.47)      | 0.93<br>(0.59)  | 0.74<br>(0.49)      | 0.78<br>(0.50)  | 0.04<br>(-0.13 to 0.22)<br>P=0.62        |
| Log FeNO (ppb)       | 3.53<br>(0.71)      | 3.66<br>(0.78)  | 3.59<br>(0.68)      | 3.67<br>(0.71)  | 0.001<br>(-0.15 to 0.16)<br>P=0.99       |

Numbers are mean (SD)

**Abbreviations:**

FEV<sub>1</sub> = Forced expiratory volume in one second; ACQ = Asthma Control Questionnaire;

FeNO = Fractional exhaled nitric oxide



## CONSORT 2010 checklist of information

Page numbers refer to the page in the manuscript [top right of document]. OS: Online supplement. P: Protocol, N/A: Not applicable

| Section/Topic                    | Item No | Checklist item                                                                                                                                                                              | Reported on page No |
|----------------------------------|---------|---------------------------------------------------------------------------------------------------------------------------------------------------------------------------------------------|---------------------|
| <b>Title and abstract</b>        |         |                                                                                                                                                                                             |                     |
|                                  | 1a      | Identification as a randomised trial in the title                                                                                                                                           | 1                   |
|                                  | 1b      | Structured summary of trial design, methods, results, and conclusions (for specific guidance see CONSORT for abstracts)                                                                     | 2-3                 |
| <b>Introduction</b>              |         |                                                                                                                                                                                             |                     |
| Background and objectives        | 2a      | Scientific background and explanation of rationale                                                                                                                                          | 4                   |
|                                  | 2b      | Specific objectives or hypotheses                                                                                                                                                           | 5                   |
| <b>Methods</b>                   |         |                                                                                                                                                                                             |                     |
| Trial design                     | 3a      | Description of trial design (such as parallel, factorial) including allocation ratio                                                                                                        | 6-8, Fig 1          |
|                                  | 3b      | Important changes to methods after trial commencement (such as eligibility criteria), with reasons                                                                                          | N/A                 |
| Participants                     | 4a      | Eligibility criteria for participants                                                                                                                                                       | 6                   |
|                                  | 4b      | Settings and locations where the data were collected                                                                                                                                        | 6-8                 |
| Interventions                    | 5       | The interventions for each group with sufficient details to allow replication, including how and when they were actually administered                                                       | 7-8                 |
| Outcomes                         | 6a      | Completely defined pre-specified primary and secondary outcome measures, including how and when they were assessed                                                                          | 8, OS               |
|                                  | 6b      | Any changes to trial outcomes after the trial commenced, with reasons                                                                                                                       | None                |
| Sample size                      | 7a      | How sample size was determined                                                                                                                                                              | 10                  |
|                                  | 7b      | When applicable, explanation of any interim analyses and stopping guidelines                                                                                                                | None                |
| <b>Randomisation:</b>            |         |                                                                                                                                                                                             |                     |
| Sequence generation              | 8a      | Method used to generate the random allocation sequence                                                                                                                                      | 7                   |
|                                  | 8b      | Type of randomisation; details of any restriction (such as blocking and block size)                                                                                                         | 7                   |
| Allocation concealment mechanism | 9       | Mechanism used to implement the random allocation sequence (such as sequentially numbered containers), describing any steps taken to conceal the sequence until interventions were assigned | 7                   |
| Implementation                   | 10      | Who generated the random allocation sequence, who enrolled participants, and who assigned participants to interventions                                                                     | 7, OS               |

|    |                                                      |     |                                                                                                                                                   |
|----|------------------------------------------------------|-----|---------------------------------------------------------------------------------------------------------------------------------------------------|
| 1  |                                                      |     |                                                                                                                                                   |
| 2  | Blinding                                             | 11a | If done, who was blinded after assignment to interventions (for example, participants, care providers, those assessing outcomes) and how          |
| 3  |                                                      |     | 7                                                                                                                                                 |
| 4  |                                                      | 11b | If relevant, description of the similarity of interventions                                                                                       |
| 5  |                                                      |     | 7                                                                                                                                                 |
| 6  | Statistical methods                                  | 12a | Statistical methods used to compare groups for primary and secondary outcomes                                                                     |
| 7  |                                                      |     | 9                                                                                                                                                 |
| 8  |                                                      | 12b | Methods for additional analyses, such as subgroup analyses and adjusted analyses                                                                  |
| 9  |                                                      |     | 9                                                                                                                                                 |
| 9  | <b>Results</b>                                       |     |                                                                                                                                                   |
| 10 | Participant flow (a diagram is strongly recommended) | 13a | For each group, the numbers of participants who were randomly assigned, received intended treatment, and were analysed for the primary outcome    |
| 11 |                                                      |     | 11, Fig 2                                                                                                                                         |
| 12 |                                                      | 13b | For each group, losses and exclusions after randomisation, together with reasons                                                                  |
| 13 |                                                      |     | 11, Fig 2, OS Table 1                                                                                                                             |
| 14 | Recruitment                                          | 14a | Dates defining the periods of recruitment and follow-up                                                                                           |
| 15 |                                                      |     | 11                                                                                                                                                |
| 16 |                                                      | 14b | Why the trial ended or was stopped                                                                                                                |
| 17 |                                                      |     | 11                                                                                                                                                |
| 18 | Baseline data                                        | 15  | A table showing baseline demographic and clinical characteristics for each group                                                                  |
| 19 |                                                      |     | Table 1                                                                                                                                           |
| 20 | Numbers analysed                                     | 16  | For each group, number of participants (denominator) included in each analysis and whether the analysis was by original assigned groups           |
| 21 |                                                      |     | 11,12                                                                                                                                             |
| 22 | Outcomes and estimation                              | 17a | For each primary and secondary outcome, results for each group, and the estimated effect size and its precision (such as 95% confidence interval) |
| 23 |                                                      |     | 11,12, Tables 2 and 3                                                                                                                             |
| 24 |                                                      | 17b | For binary outcomes, presentation of both absolute and relative effect sizes is recommended                                                       |
| 25 |                                                      |     | 11,12                                                                                                                                             |
| 26 | Ancillary analyses                                   | 18  | Results of any other analyses performed, including subgroup analyses and adjusted analyses, distinguishing pre-specified from exploratory         |
| 27 |                                                      |     | OS Tables 2 and 3                                                                                                                                 |
| 28 | Harms                                                | 19  | All important harms or unintended effects in each group (for specific guidance see CONSORT for harms)                                             |
| 29 |                                                      |     | 11,12                                                                                                                                             |
| 29 | <b>Discussion</b>                                    |     |                                                                                                                                                   |
| 30 | Limitations                                          | 20  | Trial limitations, addressing sources of potential bias, imprecision, and, if relevant, multiplicity of analyses                                  |
| 31 |                                                      |     | 13-15                                                                                                                                             |
| 32 | Generalisability                                     | 21  | Generalisability (external validity, applicability) of the trial findings                                                                         |
| 33 |                                                      |     | 13                                                                                                                                                |
| 34 | Interpretation                                       | 22  | Interpretation consistent with results, balancing benefits and harms, and considering other relevant evidence                                     |
| 35 |                                                      |     | 15,16                                                                                                                                             |
| 34 | <b>Other information</b>                             |     |                                                                                                                                                   |
| 35 | Registration                                         | 23  | Registration number and name of trial registry                                                                                                    |
| 36 |                                                      |     | 3                                                                                                                                                 |
| 37 | Protocol                                             | 24  | Where the full trial protocol can be accessed, if available                                                                                       |
| 38 |                                                      |     | 3                                                                                                                                                 |
| 39 | Funding                                              | 25  | Sources of funding and other support (such as supply of drugs), role of funders                                                                   |
| 40 |                                                      |     | 17                                                                                                                                                |



**RANDOMISED PLACEBO CONTROLLED STUDY OF THE EFFECT  
OF PARACETAMOL ON ASTHMA SEVERITY IN ADULTS**

|                                 |                                                                                                                                                                                                                                                                                                                                                                                                                                                                                                                                                                                                                                                                          |
|---------------------------------|--------------------------------------------------------------------------------------------------------------------------------------------------------------------------------------------------------------------------------------------------------------------------------------------------------------------------------------------------------------------------------------------------------------------------------------------------------------------------------------------------------------------------------------------------------------------------------------------------------------------------------------------------------------------------|
| Journal:                        | <i>BMJ Open</i>                                                                                                                                                                                                                                                                                                                                                                                                                                                                                                                                                                                                                                                          |
| Manuscript ID:                  | bmjopen-2013-004324.R1                                                                                                                                                                                                                                                                                                                                                                                                                                                                                                                                                                                                                                                   |
| Article Type:                   | Research                                                                                                                                                                                                                                                                                                                                                                                                                                                                                                                                                                                                                                                                 |
| Date Submitted by the Author:   | 18-Dec-2013                                                                                                                                                                                                                                                                                                                                                                                                                                                                                                                                                                                                                                                              |
| Complete List of Authors:       | Ioannides, Sally; Medical Research Institute of New Zealand, Williams, Mathew; Medical Research Institute of New Zealand, Jefferies, Sarah; Medical Research Institute of New Zealand, Perrin, Kyle; Medical Research Institute of New Zealand, Weatherall, Mark; University of Otago Wellington, Medicine Siebers, Robert; University of Otago Wellington, Medicine Crane, Julian; University of Otago Wellington, Medicine Patel, Mitesh; Medical Research Institute of New Zealand, Travers, Justin; Medical Research Institute of New Zealand, Shirtcliffe, Philippa; Medical Research Institute of New Zealand, Beasley, Richard; Medical Research Institute of NZ, |
| <b>Primary Subject Heading</b>: | Respiratory medicine                                                                                                                                                                                                                                                                                                                                                                                                                                                                                                                                                                                                                                                     |
| Secondary Subject Heading:      | Pharmacology and therapeutics                                                                                                                                                                                                                                                                                                                                                                                                                                                                                                                                                                                                                                            |
| Keywords:                       | Asthma < THORACIC MEDICINE, Allergy < THORACIC MEDICINE, Respiratory physiology < THORACIC MEDICINE                                                                                                                                                                                                                                                                                                                                                                                                                                                                                                                                                                      |
|                                 |                                                                                                                                                                                                                                                                                                                                                                                                                                                                                                                                                                                                                                                                          |

SCHOLARONE™  
Manuscripts

only



1  
2  
3  
4  
5  
6  
7  
8  
9  
10  
11  
12  
13  
14  
15  
16  
17  
18  
19  
20  
21  
22  
23  
24  
25  
26  
27  
28  
29  
30  
31  
32  
33  
34  
35  
36  
37  
38  
39  
40  
41  
42  
43  
44  
45  
46  
47  
48  
49  
50  
51  
52  
53  
54  
55  
56  
57  
58  
59  
60

**RANDOMISED PLACEBO CONTROLLED STUDY OF THE EFFECT OF PARACETAMOL ON  
ASTHMA SEVERITY IN ADULTS**

<sup>1,2,3</sup>Sally J Ioannides, <sup>1</sup>Mathew Williams, <sup>1,2</sup>Sarah Jefferies, <sup>1,2</sup>Kyle Perrin

<sup>2,3</sup>Mark Weatherall <sup>3</sup>Robert Siebers, <sup>3</sup>Julian Crane, <sup>1,2</sup>Mitesh Patel

<sup>1</sup>Justin Travers, <sup>1,2</sup>Philippa Shirtcliffe, <sup>1,2</sup>Richard Beasley

<sup>1</sup>Medical Research Institute of New Zealand, Wellington, New Zealand

<sup>2</sup>Capital & Coast District Health Board, Wellington, New Zealand

<sup>3</sup>University of Otago Wellington, Wellington, New Zealand

**Key words:** Asthma, paracetamol, randomised controlled trial, bronchial hyperresponsiveness

**Word count:** 3,859

**Running Title:** Effect of paracetamol on adult asthma

**Australia New Zealand Clinical Trials Registry Number:** ANZCTR12609000551291

**Central Regional Ethics Committee Number:** CEN/08/12/070

**Correspondence:**

Prof Richard Beasley  
Medical Research Institute of New Zealand  
Private Bag 7902, Wellington 6242  
New Zealand  
Telephone: 64-4-805 0230  
Fax: 64-4-389 5707  
Email: richard.beasley@mrinz.ac.nz

**ABSTRACT (word count 249)**

**Background:** Epidemiological evidence suggests that paracetamol may be a risk factor in the development of asthma and its severity. This is the first randomised placebo-controlled trial of the effect of regular paracetamol on bronchial hyperresponsiveness (BHR) and asthma control in adult asthma.

**Methods:** In a 12-week randomised, double-blind, placebo-controlled, parallel-group study, 94 adults with mild to moderate asthma received 12 weeks of 1g paracetamol twice daily or placebo twice daily. The primary outcome variable was BHR, measured as provocation concentration of methacholine causing a 20% fall in FEV<sub>1</sub> (PC<sub>20</sub>), at week 12. Secondary outcome variables included FEV<sub>1</sub>, FeNO and ACQ score.

**Results:** 94 participants received randomised treatment (36 and 58 in paracetamol and placebo groups respectively); 85 participants completed the study. At 12 weeks the mean (SD) logarithm base two PC<sub>20</sub> was 1.07 (2.36) in the control group (N=54) and 0.62 (2.09) in the paracetamol group (N=31). After controlling for baseline PC<sub>20</sub>, the mean difference (paracetamol minus placebo) was -0.48 doubling dose worsening in BHR in the paracetamol group (95% CI -1.28 to 0.32), P=0.24. There were no statistically significant differences (paracetamol minus placebo) in log FeNO 0.09 (95% CI -0.097 to 0.27), FEV<sub>1</sub> (-0.07 L (95% CI -0.15 to 0.01)), or ACQ score (-0.04 (95% CI -0.27 to 0.18)).

**Conclusions:** There was no significant effect of paracetamol on BHR and asthma control in adults with asthma. However, the study findings are limited by low power and the upper confidence limits did not rule out clinically relevant adverse effects.

**STRENGTHS AND WEAKNESSES**

- Randomised placebo-controlled trial
- Physiological, clinical and immunological outcome measures
- Powered to detect a marked effect on BHR

**KEY MESSAGES****What is the key question?**

Does regular paracetamol use result in worsening asthma severity?

**What is the bottom line?**

Paracetamol use did not cause a marked increase in bronchial hyperresponsiveness or deterioration in asthma control in adults with asthma, although it was not possible to rule out a clinically relevant effect.

**Why read on?**

This is the first randomised placebo-controlled trial to measure the effects of paracetamol in stable adult asthma. The study findings provide information on which the design of further studies can be based.

## INTRODUCTION

There is a growing body of evidence to suggest that paracetamol may play an important role as a risk factor for the development of asthma, and that increasing world-wide use may have contributed to the increasing global prevalence of asthma seen over the last 40 years.[1,2] Childhood asthma risk increases in the offspring of women who consume paracetamol during pregnancy,[3] and paracetamol use in the first 12 months of life is associated with an increased risk of wheezing at 3 years [4,5] and 6-7 years.[6] Cross-sectional surveys in children,[6] adolescents [7] and adults [8-11] consistently demonstrate an association between current paracetamol use and asthma in populations with widely differing lifestyles, standards of living, medical practice and availability of paracetamol. However, there is also evidence that these associations may, in part, be due to confounding by indication in some,[12-14] but not all cohort studies in childhood.[15] Cohort studies in adults have demonstrated that increasing frequency of paracetamol use is positively associated with newly-diagnosed (adult-onset) asthma.[16,17]

There is also evidence that paracetamol may increase the severity of asthma in those with the disease. This primarily comes from the only randomised controlled trial of the effect of paracetamol use for fever and asthma outcomes, in which asthmatic children experiencing a current febrile illness were randomised to receive either paracetamol or ibuprofen.[18] The children who received paracetamol were more likely to require an outpatient visit for asthma compared to children in the ibuprofen group. The increased risk with paracetamol was dose dependent and related to respiratory febrile illnesses rather than other causes of fever. In a case-control study which reported a dose-dependent association between paracetamol use and asthma, a progressively greater risk in those with more severe disease was noted, suggesting an effect on both causation and severity of the disease.[10]

The mounting epidemiological evidence, supported by several biologically plausible mechanisms [19-28] has led to repeated calls [2,5-7,13,29-32] for randomised controlled trials to be undertaken

1 to explore the relationship between paracetamol and asthma. This study is the first randomised  
2 controlled trial undertaken to investigate the effect of regular daily paracetamol on asthma severity  
3 in adult patients with asthma. It was powered to detect a one doubling dose change in PC<sub>20</sub>  
4 methacholine bronchial hyperresponsiveness (BHR). Markers of airways inflammation and  
5 systemic immunological responses were monitored to provide insight into possible mechanisms of  
6 action. The hypothesis was that regular paracetamol use would result in a worsening in BHR and  
7 asthma control.  
8  
9  
10  
11  
12  
13  
14  
15  
16  
17  
18  
19  
20  
21  
22  
23  
24  
25  
26  
27  
28  
29  
30  
31  
32  
33  
34  
35  
36  
37  
38  
39  
40  
41  
42  
43  
44  
45  
46  
47  
48  
49  
50  
51  
52  
53  
54  
55  
56  
57  
58  
59  
60

For peer review only

## METHODS

The study design was a double-blind, randomised, placebo-controlled, parallel group trial based in Wellington, New Zealand. The study methods are summarised with additional details provided in the supplementary appendix. The study was approved by the Central Regional Ethics Committee (CEN/08/12/070) and all participants gave written informed consent. The trial was registered on the Australian New Zealand Clinical Trials Registry (ACTRN12609000551291).

### Participants

Participants were identified from the Medical Research Institute of New Zealand (MRINZ) asthma register, general practitioner patient databases, and the general public through advertising. Inclusion criteria included age between 18 and 65 years, wheeze in the previous 12 months and a doctor's diagnosis of asthma, forced expiratory volume in 1 second (FEV<sub>1</sub>)  $\geq$ 70% predicted at screening and baseline and a PC<sub>20</sub> MCh (the provocation concentration of methacholine causing a 20% reduction in FEV<sub>1</sub>) of between 0.125 and 16 mg/ml at baseline. Exclusion criteria included regular use of theophylline, ipratropium bromide, tiotropium or leukotriene receptor antagonists in the previous 3 months, alanine aminotransferase (ALT) levels greater than 1.5 times the upper limit of normal at baseline, a history of liver disease or the current use of hepatotoxic drugs, an exacerbation of asthma within the previous two months requiring prednisone or nebulised bronchodilator, current or past cigarette smoking >10 pack years, history of sensitivity or allergy to paracetamol or current regular use of paracetamol, use of high-dose aspirin or non-steroidal anti-inflammatory drugs, history of alcoholism or current excessive alcohol intake, history of previous intentional overdose of paracetamol, previous suicide attempt or current unstable depression, body mass index <16 kg/m<sup>2</sup>, pregnant or breast-feeding women or women not using adequate contraception and participants unsuitable for BHR challenge testing in accordance with American Thoracic Society (ATS) criteria.[33]

## Interventions

Participants were randomised to receive one of two treatment regimens for 12 weeks. The treatments were paracetamol 1g, administered as two 500mg tablets, or placebo administered as two identically appearing tablets, taken twice daily. The paracetamol and placebo tablets were supplied by Aspen Asia Pacific Ltd, Sydney, Australia. All participants were instructed to avoid taking other forms of paracetamol (including over-the-counter remedies containing paracetamol) or non-steroidal anti-inflammatory drugs (NSAIDs) for the duration of the study. All participants were provided with a prescription for codeine to use as an analgesic during the study.

## Randomisation

A computer-generated randomisation schedule was generated by the study statistician and was administered by the study pharmacists. It was necessary to randomise the participants prior to their final eligibility screening visit (visit 2) to enable the study pharmacists adequate time to prepare the study medication for dispensing at visit 2 following final determination of eligibility. If a participant failed one of the eligibility criteria at visit 2, the randomised medication was not dispensed and the participant was withdrawn from the study. The randomisation code was not re-used.

## Blinding

Study investigators, participants, and participant health care providers were blinded through provision of medication as identically appearing tablets in bottles, with neither the investigator dispensing the medication or the participants aware of the allocated treatment.

## Design

The trial involved four study clinic visits and between two and four additional blood tests over 13 weeks (Figure 1). A screening visit (visit 1) was held approximately one week prior to baseline and consisted of a medical history and brief physical examination, pregnancy test where applicable, bronchodilator reversibility testing, liver function screen and allergy skin prick tests (see online

1 supplement for details). A diary was used to record morning and evening peak expiratory flow  
2 (PEF) values (prior to asthma medication use) for one week prior to the second visit. Participants  
3 who met initial eligibility criteria were randomised at this stage, prior to final eligibility assessment  
4 at visit 2.  
5  
6  
7  
8  
9

10  
11 At visit 2, designated the baseline visit, the Qoltech asthma control questionnaire (ACQ)[34] was  
12 administered and  $PEF_{var}$  (PEF variability measured as the amplitude as a percentage of the mean)  
13 calculated. Baseline assessments of  $FEV_1$  were undertaken using a Micro Medical Microlab  
14 spirometer (Micro Medical, Kent, UK) and Fractional exhaled Nitric Oxide (FeNO) was assessed  
15 using a NiOX Flex chemiluminescence analyser (Aerocrine AB, Stockholm, Sweden).  
16 Methacholine (Methapharm, Ontario, Canada) challenge testing was undertaken via the two-  
17 minute tidal breathing dosing protocol recommended by the ATS,[33] as outlined in the online  
18 supplement. Participants who met all the eligibility criteria were then dispensed a six-week supply  
19 of randomised medication, a medication diary to record administered doses and a prescription for  
20 codeine phosphate for emergency pain relief during the trial period. These participants then  
21 underwent blood tests including full blood count (eosinophils), total serum immunoglobulin E (IgE),  
22 and serum cytokine levels (interferon (IFN)- $\gamma$ , interleukin (IL)-4, IL-5, IL-13) (see online supplement  
23 for details).  
24  
25  
26  
27  
28  
29  
30  
31  
32  
33  
34  
35  
36  
37  
38  
39

40 At visits 3 and 4, six and 12 weeks after baseline,  $FEV_1$ , ACQ, FeNO and blood tests were  
41 repeated and medication compliance checked via pill count and medication diary check (see online  
42 supplement for details). At the third visit, participants were given a further six-week supply of study  
43 medication, a second medication diary, and a diary to record morning and evening PEF values in  
44 the final intervention week. At the fourth and final visit, BHR testing was repeated. Liver function  
45 tests were monitored throughout the study (see online supplement for details).  
46  
47  
48  
49  
50  
51  
52  
53  
54

## 55 Outcomes

56  
57  
58  
59  
60



1 The primary outcome variable was PC<sub>20</sub> MCh at 12 weeks, adjusted for baseline. This direct  
2 measure of BHR was chosen as an objective well standardised physiological measure of asthma  
3 severity, recommended for monitoring the effects of therapy which may modify asthma  
4 severity.[33,35] Secondary outcome measures were FEV<sub>1</sub>, FEV<sub>1</sub> % predicted, ACQ score and  
5 FeNO at six and 12 weeks, and the mean morning peak flow, PEF<sub>var</sub>, and exacerbations of asthma  
6 (requiring a doctor's visit and need for prednisone or nebulised bronchodilator) at 12 weeks. Blood  
7 eosinophil, serum IgE, and serum cytokine (IFN- $\gamma$ , IL-4, IL-5 and IL-13) levels were measured at  
8 six and 12 weeks.  
9  
10  
11  
12  
13  
14  
15  
16  
17  
18  
19

### 20 **Statistical Methods**

21 The primary analysis method was ANCOVA. The logarithm base two PC<sub>20</sub> for methacholine at 12  
22 weeks was the primary response variable, with the baseline logarithm base two PC<sub>20</sub> as a  
23 covariate, and a categorical variable for the paracetamol group. The difference in logarithm base  
24 two PC<sub>20</sub> was the doubling dose difference between the two randomised groups. Secondary  
25 outcome variables, including FEV<sub>1</sub>, FEV<sub>1</sub> % predicted, ACQ score, FeNO, mean morning peak flow  
26 and PEF<sub>var</sub> were also analyzed by ANCOVA. The distribution of FeNO, serum IgE and eosinophil  
27 count was skewed and normality assumptions for these variables were best met on the natural  
28 logarithm scale.  
29  
30  
31  
32  
33  
34  
35  
36  
37  
38  
39

40 The proportion of participants with at least one asthma exacerbation was compared as an absolute  
41 risk difference, with an appropriate confidence interval, because in the event there were no asthma  
42 exacerbations in one of the randomised groups so that a relative risk could not be calculated.  
43  
44

45 Simple t-tests were used to compare mean values for ALT by randomised group. FeNO, eosinophil  
46 count and IgE were logarithm transformed because of skewed distributions, and the difference in  
47 logarithms was compared by a t-test. For those three variables with a logarithm transformation, the  
48 exponent of the difference in logarithms is interpreted as the ratio of mean values.  
49  
50  
51  
52  
53  
54  
55  
56  
57  
58  
59  
60

1 The analysis was by intention to treat of randomised participants who passed the final eligibility  
2 screening and as a result received randomised treatment. No randomised participants who failed  
3 the final eligibility screen received randomised treatment or underwent any outcome assessments.  
4 For each individual analysis, a two-sided P value of 0.05 was used, with 95% confidence intervals  
5 for each estimate. We have not adjusted for multiple statistical testing.  
6  
7  
8  
9  
10  
11

### 12 **Sample Size**

13  
14 A sample size of 60 in each group has 80% power at the 5% level of significance to detect a difference  
15 of one doubling dose in PC<sub>20</sub> MCh between the groups, based on a standard deviation of 1.9.[36] To  
16 allow for the possibility of up to 10% of study participants withdrawing early from the study, a recruitment  
17 target of 66 participants was set for each group.  
18  
19  
20  
21  
22  
23  
24  
25  
26  
27  
28  
29  
30  
31  
32  
33  
34  
35  
36  
37  
38  
39  
40  
41  
42  
43  
44  
45  
46  
47  
48  
49  
50  
51  
52  
53  
54  
55  
56  
57  
58  
59  
60

## RESULTS

Recruitment commenced in June 2009 and ended in September 2011. The planned study period of two years was extended by three months due to difficulties in recruitment. Figure 2 shows the flow of participants. There were 724 patients assessed for eligibility at phone screening and/or visit 1; of these, 338 failed to meet the inclusion criteria and 205 declined to participate (see online supplement). There were 181 participants randomised prior to visit 2 based on initial eligibility at visit 1; 91 to the paracetamol group and 92 to the placebo group. 53/91 participants allocated to the paracetamol group and 34/92 allocated to the placebo group were withdrawn at visit 2 as they either did not meet the inclusion/exclusion criteria ( $PC_{20} > 16\text{mg/ml}$ ,  $n=68$ ;  $PC_{20} < 0.125\text{mg/ml}$ ,  $n=3$ ;  $FEV_1 < 70\%$  predicted,  $n=6$ ; unable to perform spirometry,  $n=1$ ) or were lost to follow-up or withdrew consent ( $n=9$ ). No study medication was dispensed to the participants who were withdrawn at visit 2 (see online supplement).

Medication was dispensed to 94 participants who commenced the intervention phase following visit 2: 36 randomised to paracetamol and 58 to placebo. The characteristics of the subjects are shown in Table 1. The mean age of participants was 40 years and there were 59 female participants. Approximately 30% of study participants were prescribed inhaled corticosteroids and 18% prescribed long-acting beta agonist drugs. Around 90% of participants had positive skin prick tests to either cat, mixed grass or house dust mite. Participants had mild to moderate asthma, with a baseline ACQ score of 0.86 (SD 0.59). The baseline mean FeNO was 48.9 ppb (SD 41.3) and the mean  $FEV_1$  was 94% of predicted (SD 12.0). The baseline mean  $PC_{20}$  was 4.29 mg/ml (SD 4.54).

There were 85/94 participants who completed the study. Five participants were withdrawn from the paracetamol group; two withdrew at the participant's own discretion, one was excluded due to a raised ALT (119 IU/L), one was lost to follow-up and one was excluded due to intercurrent illness. Four participants were withdrawn from the placebo group; two were excluded due to a raised ALT

1  
2 (207 and 227 IU/L respectively), one withdrew at the participant's own discretion and one was lost  
3  
4 to follow-up.

### 8 **Primary Outcome Variable**

9  
10 At 12 weeks the mean (SD) logarithm base two PC<sub>20</sub> was 1.07 (2.36) in the control group (N=54)  
11 and 0.62 (2.09) in the paracetamol group (N=31). After controlling for baseline PC<sub>20</sub>, the difference  
12 (expressed as a doubling dose difference, paracetamol minus placebo) was not statistically  
13  
14 significant: -0.48 (95% CI -1.28 to 0.32), P=0.24 (Table 2).  
15  
16  
17

### 20 **Secondary Outcome Variables**

21  
22 There were no statistically significant differences in FEV<sub>1</sub>, FEV<sub>1</sub> % predicted, ACQ score, mean  
23 morning peak flow or PEF<sub>var</sub> between the control and paracetamol groups at Week 12 (Table 2) or  
24 in FEV<sub>1</sub> or ACQ score at Week 6 (Online Supplement). There were three asthma exacerbations in  
25  
26 the placebo group and none in the paracetamol group, an absolute difference of 5.6% (95% CI -0.5  
27 to 11.7%). There was 93.2% compliance in the control group and 90.8% compliance in the  
28 paracetamol group when assessed by pill count and medication diaries, a difference of 2.4%, (95%  
29 CI -1.0 to 5.8). Serum paracetamol levels (greater than the 30 µmol/L threshold) were detectable  
30 in between 31.3 to 38.7% of participants in the paracetamol group and were undetectable in all  
31 participants in the placebo group between week 2 and week 12 of the study.  
32  
33  
34  
35  
36  
37  
38  
39  
40  
41

42  
43 There were no statistically significant differences observed in log FeNO at Week 6 (see Online  
44 Supplement), or at Week 12, or in log eosinophil or log IgE levels between the two groups at week  
45  
46 12 (Table 3). Only a proportion of participants had measurable levels of IFN- $\gamma$ , IL-4, IL-5 and IL-13  
47 at baseline or at other times throughout the trial, precluding meaningful analysis (see online  
48 supplement). ALT levels were significantly higher in the paracetamol group, with a mean ALT of  
49 25.4 (SD 9.7) and 19.0 (SD 6.0) in the paracetamol and placebo groups respectively at visit 4,  
50  
51 difference 6.3 (95% CI 2.9 to 9.7, p <0.001).  
52  
53  
54  
55  
56  
57  
58  
59  
60

## DISCUSSION

This double-blind, randomised, placebo-controlled, parallel group study found no statistically significant increase in BHR with 12-weeks paracetamol treatment. However, the results did not rule out a clinically significant effect, with the 95% confidence interval containing the pre-specified difference of one doubling dose reduction in PC<sub>20</sub>. There were no significant differences observed in any of the pre-specified secondary outcome variables of asthma control, inflammatory or immunological markers.

This is the first reported randomised placebo-controlled trial of the effects of daily paracetamol in stable adult asthma. The only other published randomised controlled trial of paracetamol and asthma was the Boston University Fever Study.[18] Children randomised to the ibuprofen group had a reduced risk of having an outpatient visit for asthma during the 4 week study period (OR 0.56, 95% CI 0.34 to 0.95) compared with children in the paracetamol group. Because the study did not include a placebo treatment, it was not possible to determine whether the observed difference in morbidity according to treatment group was attributable to an increased risk with paracetamol or a decreased risk with ibuprofen.

There are several methodological issues relevant to the interpretation of our study findings. First, as enshrined in the Declaration of Helsinki [37] there is a requirement to study the least vulnerable populations wherever applicable. Most, but not all, of the putative adverse effects of paracetamol on asthma have been shown in observational studies of children and suggest that paracetamol may increase the risk of developing asthma.[1,2] However, as there is some data to suggest that regular paracetamol use may lead to a deterioration in asthma control in adults,[1,10] we opted to firstly examine the effects of paracetamol in adults with stable asthma.

Second, this trial was powered to determine whether there was an effect on BHR of at least one-doubling dose reduction in PC<sub>20</sub> MCh. Our ability to achieve the designated sample size completing

1 the study was affected by several factors. First, despite a rigorous recruitment campaign during  
2 which over 700 patients were screened, due to the inclusion and exclusion criteria employed to  
3 ensure participant safety, only 94 screened participants were dispensed randomised medication.  
4  
5 Secondly, variability in PC<sub>20</sub> from baseline to week 12 was larger than anticipated, with a pooled  
6 SD of 2.27 doubling doses compared to that used in the sample size calculation based on a SD of  
7 1.9, derived from previous studies.[36] Another factor which affected the study power was the  
8 requirement to randomise subjects prior to their final screening visit in order to allow the pharmacy  
9 adequate time for dispensing at visit 2, following final determination of eligibility. If the participant  
10 failed this final eligibility, the randomised medication was not dispensed, the participant was  
11 withdrawn from the study, and the randomisation code was not reused. By chance this resulted in  
12 a disparity between the proportion of participants receiving active or placebo study medication. The  
13 power was reduced further due to the withdrawal of 10% of participants following randomisation.  
14  
15 As there is an uncertain association between observed variables and missing BHR data in these  
16 participants, it was not possible to perform a robust imputation.  
17  
18  
19  
20  
21  
22  
23  
24  
25  
26  
27  
28  
29  
30  
31

32 Compliance was high when measured via pill count, and although less than half of participants in  
33 the paracetamol group had measurable levels of paracetamol in the blood at the times tested  
34 throughout the study, this is likely to be due to the laboratory cut-off for a detectable paracetamol  
35 level (30 µmol/L). Following a 1g dose, participant blood levels may fall below this laboratory cut-  
36 off level in as little as 3 hours (given an paracetamol half-life of 2 hours and a peak plasma  
37 concentration 1 hour after administration of 80 µmol/L [38]). The use of this laboratory cut-off for  
38 paracetamol levels meant that it was not possible to investigate medication compliance through  
39 this method.  
40  
41  
42  
43  
44  
45  
46  
47  
48  
49  
50

51 Our 12-week dosing period was chosen based on evidence that regular, long-term use of  
52 paracetamol is associated with an increased risk of asthma in adults [9-11,16,17] and that chronic  
53 ingestion of therapeutic doses can reduce serum antioxidant capacity in as little as two weeks.[39]  
54  
55 We had originally intended to use the maximum daily dose of 4g paracetamol, however chose to  
56  
57  
58  
59  
60

1 administer half this dose due to concerns of liver toxicity. These concerns were based on a  
2  
3 previous clinical trial of paracetamol in which the incidence of ALT elevations more than three  
4  
5 times the upper limit of normal in healthy participants taking 4g/day for 14 days was 31 to  
6  
7 44%.<sup>[40]</sup> Our results showed no clinically significant liver function derangement with paracetamol  
8  
9 administered at a dose of 2g/day for 12 weeks.  
10

11  
12  
13  
14 Whilst the study did not demonstrate a statistically significant effect of paracetamol on BHR to  
15  
16 MCh, the results do not rule out a clinically significant effect, with the upper 95% confidence  
17  
18 interval of a 1.28 doubling-dose worsening in BHR containing the pre-specified difference of one  
19  
20 doubling-dose. Furthermore, our point estimate of a reduction in PC<sub>20</sub> of 0.48 of a doubling-dose  
21  
22 could potentially be of major public health significance. As proposed by Mitchell,<sup>[41]</sup> a small shift to  
23  
24 the left of the BHR curve in a population could lead to a relatively large increase in the prevalence  
25  
26 of severe asthma. Relevant to the interpretation of our findings it has recently been calculated that  
27  
28 a one half doubling dose increase in BHR increases the prevalence of moderate and severe BHR  
29  
30 by about 30%.<sup>[42]</sup> Likewise, although the 9% increase in FeNO with paracetamol was not  
31  
32 statistically significant, a change of this magnitude is considered clinically significant.<sup>[43]</sup> For  
33  
34 FEV<sub>1</sub>, the point estimate was consistent with a lower value in the paracetamol group, however the  
35  
36 difference was of uncertain clinical significance and was associated with wide confidence intervals.  
37  
38  
39

40 No significant effect was seen on serum IgE or peripheral blood eosinophil levels. It was not  
41  
42 possible to undertake any meaningful analysis of the cytokine measurements, due to the low  
43  
44 numbers of participants with detectable levels, and as a result we were unable to determine if  
45  
46 paracetamol influenced the Th1/Th2 balance. Another less recognised potential mechanism of  
47  
48 action, which was not directly assessed in this study, relates to neurogenic inflammation of the  
49  
50 airways through the stimulation of the transient receptor potential ankyrin-1 (TRPA-1) cation  
51  
52 channel by NAPQI, the metabolite of paracetamol.<sup>[26]</sup> This pathway, which is activated following  
53  
54 therapeutic doses of paracetamol, mediates a non-eosinophilic inflammatory response and has  
55  
56  
57  
58  
59  
60

1  
2  
3  
4  
5  
6  
7  
8  
9  
10  
11  
12  
13  
14  
15  
16  
17  
18  
19  
20  
21  
22  
23  
24  
25  
26  
27  
28  
29  
30  
31  
32  
33  
34  
35  
36  
37  
38  
39  
40  
41  
42  
43  
44  
45  
46  
47  
48  
49  
50  
51  
52  
53  
54  
55  
56  
57  
58  
59  
60

been implicated in the pathogenesis or provocation of asthma by isocyanates, aldehydes, cigarette smoke and chlorine.[44,45]

Our findings provide information on which the design of further studies could be based. A trial of similar design, utilising the same duration and dose of paracetamol and with BHR testing to MCh as the primary outcome variable, based on the standard deviation derived from this study, would require a sample size of approximately 650 to attain adequate power to detect a difference of 0.5 doubling-doses. Alternatively, a study of short-term use of paracetamol at higher doses could be undertaken, to more closely replicate the common use of paracetamol for relief of fever or pain in self-limited illnesses. Based on our findings, a sample size of 140 would be adequate to determine a 0.5 doubling-dose difference in MCh BHR, and a 10% increase in FeNO, in a short-term study of cross-over design. Important issues with the design of such a study are the duration of both the treatment periods and the crossover period. It would be important if possible to include a placebo rather than ibuprofen arm, as NSAIDs may have the potential to both cause NSAID-induced bronchospasm, as well as reducing asthma severity with long term use.[29]

Finally, our study investigated the effect of paracetamol on asthma severity and not whether paracetamol has a role in the pathogenesis of asthma. Testing this hypothesis would require clinical trials both of the effect of paracetamol use in pregnancy on the development of asthma in childhood, and the effect of paracetamol use in infants and older children and subsequent asthma risk. Such studies would raise ethical and practical issues regarding consent and the use of placebo for the management of pain or fever during pregnancy and in young children. However given the common usage of paracetamol in all age groups including pregnancy and the global burden of asthma, we propose that randomised controlled trials are required to determine the effect of paracetamol use on the development of asthma in infancy and early childhood.

In conclusion, this study has shown no significant effect of 12 weeks of treatment with paracetamol at half the maximum therapeutic daily dose on BHR and asthma control in adults with well



1 controlled asthma. Whilst this outcome provides some reassurance that regular paracetamol use  
2  
3 has no marked deleterious effect in adult asthma, further adequately powered studies are needed  
4  
5 before the safety of paracetamol for patients with asthma is assured. Furthermore, the study  
6  
7 findings do not preclude an effect of paracetamol on the development of asthma in infancy,  
8  
9 childhood or adult life.  
10  
11  
12  
13  
14  
15  
16  
17  
18  
19  
20  
21  
22  
23  
24  
25  
26  
27  
28  
29  
30  
31  
32  
33  
34  
35  
36  
37  
38  
39  
40  
41  
42  
43  
44  
45  
46  
47  
48  
49  
50  
51  
52  
53  
54  
55  
56  
57  
58  
59  
60

For peer review only

**COMPETING INTERESTS**

R Beasley has been a member of the GlaxoSmithKline (NZ) Advisory Board, and received research grants, payment for lectures or support to attend meetings from GlaxoSmithKline, a manufacturer of paracetamol.

**FUNDING**

SJ Ioannides is a Health Research Council Clinical Research Training Fellow. Funding for the study was through research grants from the Health Research Council of New Zealand, the Wellington Medical Research Foundation, the Asthma and Respiratory Foundation of New Zealand, and the University of Otago.

**CONTRIBUTORSHIP STATEMENT:**

SJ Ioannides was principal investigator and contributed to study planning, study conduct, data analysis and manuscript preparation. K Perrin contributed to study planning, study conduct and manuscript preparation, M Williams, S Jefferies and M Patel contributed to study conduct, M Weatherall contributed to randomisation, statistical analysis and preparation of manuscript, R Siebers contributed to blood analysis and preparation of manuscript, J Crane contributed to study planning and manuscript preparation, J Travers and P Shirtcliffe were safety investigators and R Beasley contributed to study planning, study conduct, data analysis and manuscript preparation

**DATA SHARING STATEMENT**

No additional data

## REFERENCES

1. Farquhar H, Stewart A, Mitchell E, et al. The role of paracetamol in the pathogenesis of asthma. *Clin Exp Allergy* 2010;**40**:32-41.
2. McBride JT. The Association of Acetaminophen and Asthma Prevalence and Severity. *Pediatrics* 2011;**128**:1181-5.
3. Eyers S, Weatherall M, Jefferies S, et al. Paracetamol in pregnancy and the risk of wheezing in offspring: a systematic review and meta-analysis. *Clin Exp Allergy* 2011;**41**:482-9.
4. Shaheen SO, Newson RB, Sherriff A, et al. Paracetamol use in pregnancy and wheezing in early childhood. *Thorax* 2002;**57**:958-63.
5. Amberbir A, Medhin G, Alem A, et al. The role of acetaminophen and geohelminth infection on the incidence of wheeze and eczema: a longitudinal birth-cohort study. *Am J Respir Crit Care Med* 2010;**183**:165-70.
6. Beasley R, Clayton T, Crane J, et al. Association between paracetamol use in infancy and childhood, and risk of asthma, rhinoconjunctivitis, and eczema in children aged 6-7 years: analysis from Phase Three of the ISAAC programme. *Lancet* 2008;**372**:1039-48.
7. Beasley RW, Clayton TO, Crane J, et al. Acetaminophen use and risk of asthma, rhinoconjunctivitis and eczema in adolescents: ISAAC Phase Three. *Am J Respir Crit Care Med* 2011;**183**:171-8.
8. Davey G, Berhane Y, Duncan P, et al. Use of acetaminophen and the risk of self-reported allergic symptoms and skin sensitization in Butajira, Ethiopia. *J Allergy Clin Immunol* 2005;**116**:863-8.
9. McKeever TM, Lewis SA, Smit HA, et al. The association of acetaminophen, aspirin, and ibuprofen with respiratory disease and lung function. *Am J Respir Crit Care Med* 2005;**171**:966-71.
10. Shaheen SO, Sterne JA, Songhurst CE, Burney PG. Frequent paracetamol use and asthma in adults. *Thorax* 2000;**55**:266-70.

- 1  
2  
3  
4  
5  
6  
7  
8  
9  
10  
11  
12  
13  
14  
15  
16  
17  
18  
19  
20  
21  
22  
23  
24  
25  
26  
27  
28  
29  
30  
31  
32  
33  
34  
35  
36  
37  
38  
39  
40  
41  
42  
43  
44  
45  
46  
47  
48  
49  
50  
51  
52  
53  
54  
55  
56  
57  
58  
59  
60
11. Shaheen S, Potts J, Gnatiuc L, et al. The relation between paracetamol use and asthma: a GA2LEN European case-control study. *Eur Respir J* 2008;**32**:1231-6.
12. Schnabel E, Heinrich J. Respiratory tract infections and not paracetamol medication during infancy are associated with asthma development in childhood. *J Allergy Clin Immunol* 2010;**126**:1071-3.
13. Tapiainen T, Dunder T, Mottonen M, et al. Adolescents with asthma or atopic eczema have more febrile days in early childhood: a possible explanation for the connection between paracetamol and asthma? *J Allergy Clin Immunol* 2010;**125**:751-2.
14. Lowe AJ, Carlin JB, Bennett CM, et al. Paracetamol use in early life and asthma: prospective birth cohort study. *BMJ* 2010;**341**:c4616.
15. Kreiner-Møller E, Sevelsted A, Vissing NH, et al. Infant acetaminophen use associates with early asthmatic symptoms independently of respiratory tract infections: The Copenhagen Prospective Study on Asthma in Childhood 2000 (COPSAC<sub>2000</sub>) cohort. *J Allergy Clin Immunol* 2012;**130**:1434-6.
16. Barr RG, Wentowski CC, Curhan GC, et al. Prospective study of acetaminophen use and newly diagnosed asthma among women. *Am J Respir Crit Care Med* 2004;**169**:836-41.
17. Thomsen SF, Kyvik KO, Skadhauge L, et al. Intake of paracetamol and risk of asthma in adults. *J Asthma* 2008;**45**:675-6.
18. Lesko SM, Louik C, Vezina RM, Mitchell AA et al. Asthma morbidity after the short-term use of ibuprofen in children. *Pediatrics* 2002;**109**:E20.
19. Rahman I, MacNee W. Oxidative stress and regulation of glutathione in lung inflammation. *Eur Respir J* 2000;**16**:534-54.
20. Chen TS, Richie JP Jr, Lang CA. Life span profiles of glutathione and acetaminophen detoxification. *Drug Metab Dispos* 1990;**18**:882-7.
21. Dimova S, Hoet P, Dinsdale D, et al. Acetaminophen decreases intracellular glutathione levels and modulates cytokine production in human alveolar macrophages and Type II pneumocytes in vitro. *Int J Biochem Cell Biol* 2005;**37**:1727-37.

- 1  
2  
3  
4  
5  
6  
7  
8  
9  
10  
11  
12  
13  
14  
15  
16  
17  
18  
19  
20  
21  
22  
23  
24  
25  
26  
27  
28  
29  
30  
31  
32  
33  
34  
35  
36  
37  
38  
39  
40  
41  
42  
43  
44  
45  
46  
47  
48  
49  
50  
51  
52  
53  
54  
55  
56  
57  
58  
59  
60
22. Kozer E, Evans S, Barr J, et al. Glutathione, glutathione-dependent enzymes and antioxidant status in erythrocytes from children treated with high-dose paracetamol. *Br J Clin Pharmacol* 2003;**55**:234-40.
23. Micheli L, Cerretani D, Fiaschi AI, et al. Effect of acetaminophen on glutathione levels in rat testis and lung. *Environ Health Perspect* 1994;**102(Suppl 9)**:63-4.
24. Eneli I, Sadri K, Camargo C Jr, et al. Acetaminophen and the risk of asthma: the epidemiologic and pathophysiologic evidence. *Chest* 2005;**127**:604-12.
25. Lenney W, Fryer AA. The genetics of asthma: are the glutathione S-transferases serious players? *Clin Exp Allergy* 2007;**37**:1124-6.
26. Nassini R, Materazzi S, Andre E, et al. Acetaminophen, via its reactive metabolite N-acetyl-p-benzo-quinoneimine and transient receptor potential ankyrin-1 stimulation, causes neurogenic inflammation in the airways and other tissues in rodents. *FASEB J* 2010;**24**:4904-16.
27. Peterson JD, Herzenberg LA, Vasquez K, et al. Glutathione levels in antigen-presenting cells modulate Th1 versus Th2 response patterns. *Proc Natl Acad Sci USA* 1998;**95**:3071-6.
28. Prymula R, Siegrist CA, Chlibek R, et al. Effect of prophylactic paracetamol administration at time of vaccination on febrile reactions and antibody responses in children: two open-label, randomised controlled trials. *Lancet* 2009;**374**:1339-50.
29. Barr RG. Does paracetamol cause asthma in children? Time to remove the guesswork. *Lancet* 2008;**372**:1011-2.
30. Farquhar H, Crane J, Mitchell EA, et al. The acetaminophen and asthma hypothesis 10 years on: A case to answer. *J Allergy Clin Immunol* 2009;**124**:649-51.
31. Johnson CC, Ownby DR. Have the efforts to prevent aspirin-related Reye's syndrome fuelled an increase in asthma? *Clin Exp Allergy* 2011;**41**:296-8.
32. Holgate ST. The acetaminophen enigma in asthma. *Am J Respir Crit Care Med* 2011;**183**:147-8.
33. American Thoracic Society. Guidelines for Methacholine and Exercise Challenge Testing 1999. *Am J Respir Crit Care Med* 2000;**161**:309-29.

- 1  
2  
3  
4  
5  
6  
7  
8  
9  
10  
11  
12  
13  
14  
15  
16  
17  
18  
19  
20  
21  
22  
23  
24  
25  
26  
27  
28  
29  
30  
31  
32  
33  
34  
35  
36  
37  
38  
39  
40  
41  
42  
43  
44  
45  
46  
47  
48  
49  
50  
51  
52  
53  
54  
55  
56  
57  
58  
59  
60
34. Juniper EF, O'Byrne PM, Guyatt GH, et al. Development and validation of a questionnaire to measure asthma control. *Eur Respir J* 1999;**14**:902-7.
35. Reddel HK, Taylor DR, Bateman ED, et al. An official American Thoracic Society/European Respiratory Society Statement: Asthma Control and Exacerbations. Standardizing Endpoints for Clinical Asthma Trials and Clinical Practice. *Am J Respir Crit Care Med* 2009;**180**:59-99.
36. Chinn S, Schouten JP. Reproducibility of non-specific bronchial challenge in adults: implications for design, analysis and interpretation of clinical and epidemiological studies. *Thorax* 2005;**60**:395-400.
37. World Medical Association: Declaration of Helsinki Ethical Principles for Medical Research Involving Human Subjects *JAMA* 2000;**284**:3043-5.
38. Gibb IA, Anderson BJ. Paracetamol (acetaminophen) pharmacodynamics: interpreting the plasma concentration. *Arch Dis Child* 2008;**93**:241-7.
39. Nuttall SL, Khan JN, Thorpe GH, et al. The impact of therapeutic doses of paracetamol on serum total antioxidant capacity. *J Clin Pharm Ther* 2003;**28**:289-94.
40. Watkins PB, Kaplowitz N, Slattery JT, et al. Aminotransferase elevations in healthy adults receiving 4 grams of acetaminophen daily – A randomized controlled trial. *JAMA* 2006;**296**:87-93.
41. Mitchell EA. Is current treatment increasing asthma mortality and morbidity? *Thorax* 1989;**44**:81-4.
42. Weatherall M, Fingleton J, Evers S, et al. A half doubling dose change in bronchial hyperresponsiveness in a population represents an important difference. *Trans Resp Med* 2013;doi:10.1186/2213-0802-1-4.
43. Lim KG, Mottram C. The use of fraction of exhaled nitric oxide in pulmonary practice. *Chest* 2008;**133**:1232-42.
44. Bautista DM, Jordt SE, Nikai T, et al. TRPA1 mediates the inflammatory actions of environmental irritants and proalgesic agents. *Cell* 2006;**124**:1269-82.

- 1  
2  
3  
4  
5  
6  
7  
8  
9  
10  
11  
12  
13  
14  
15  
16  
17  
18  
19  
20  
21  
22  
23  
24  
25  
26  
27  
28  
29  
30  
31  
32  
33  
34  
35  
36  
37  
38  
39  
40  
41  
42  
43  
44  
45  
46  
47  
48  
49  
50  
51  
52  
53  
54  
55  
56  
57  
58  
59  
60
45. Caceres AI, Brackmann M, Elia MD, et al. A sensory neuronal ion channel essential for airway inflammation and hyperreactivity in asthma. *Proc Natl Acad Sci USA* 2009;**106**:9099-104.

For peer review only

Table 1: Characteristics of participants who received randomised treatment

|                                                | Paracetamol Group | Placebo Group     |
|------------------------------------------------|-------------------|-------------------|
| <b>Number</b>                                  | 36                | 58                |
| <b>Demographic</b>                             |                   |                   |
| Mean age, y $\pm$ SD                           | 41.5 $\pm$ 13.9   | 38.3 $\pm$ 12.5   |
| Male sex, No. (%)                              | 15 (41.7)         | 20 (34.5)         |
| Weight, Kg $\pm$ SD                            | 75.1 $\pm$ 16.7   | 77.4 $\pm$ 17.8   |
| Height, m $\pm$ SD                             | 1.7 $\pm$ 0.1     | 1.69 $\pm$ 0.11   |
| BMI, Kg/m <sup>2</sup> $\pm$ SD                | 25.9 $\pm$ 4.2    | 27.1 $\pm$ 5.8    |
| <b>Medication Use</b>                          |                   |                   |
| ICS, No. (%)                                   | 9 (25%)           | 20 (34%)          |
| SABA, No. (%)                                  | 33 (92%)          | 55 (95%)          |
| LABA, No. (%)                                  | 9 (25%)           | 8 (14%)           |
| <b>Defining Study Population</b>               |                   |                   |
| FEV <sub>1</sub> , L $\pm$ SD                  | 3.09 $\pm$ 0.78   | 3.12 $\pm$ 0.87   |
| FEV <sub>1</sub> % Predicted $\pm$ SD          | 94.1 $\pm$ 11.3   | 94.0 $\pm$ 12.4   |
| Bronchodilator Reversibility (%)               | 9.1 $\pm$ 6.0     | 7.8 $\pm$ 5.5     |
| SPT Cat pelt, No. (% +ve)                      | 20 (55.6)         | 33 (57.9)         |
| SPT D. pteronyssinus No. (% +ve)               | 30 (83.3)         | 52 (91.2)         |
| SPT Mixed grass, No. (% +ve)                   | 25 (69.4)         | 38 (66.7)         |
| SPT at least one positive, No. (% +ve)         | 33 (91.7)         | 55 (96.5)         |
| <b>Clinical and Physiological Measurements</b> |                   |                   |
| PC <sub>20</sub> MCh, mg/ml $\pm$ SD           | 4.14 $\pm$ 4.42   | 4.39 $\pm$ 4.66   |
| Mean morning peak flow, L/min $\pm$ SD         | 424.0 $\pm$ 83.8  | 419.5 $\pm$ 92.3  |
| PEF <sub>var</sub> , %, $\pm$ SD               | 19.0 $\pm$ 9.3    | 22.2 $\pm$ 10.5   |
| ACQ Score $\pm$ SD                             | 0.93 $\pm$ 0.63   | 0.82 $\pm$ 0.56   |
| <b>Inflammation and Immunology</b>             |                   |                   |
| FeNO, ppb $\pm$ SD                             | 44.9 $\pm$ 39.2   | 51.3 $\pm$ 42.6   |
| Eosinophils, x 10 <sup>9</sup> /L, $\pm$ SD    | 0.26 $\pm$ 0.12   | 0.32 $\pm$ 0.17   |
| IgE, kU/L, $\pm$ SD                            | 518.4 $\pm$ 705.7 | 480.4 $\pm$ 914.0 |

**Abbreviations:** BMI = Body mass index; ICS = Inhaled corticosteroid; SABA = Short-acting beta agonist; LABA = Long-acting beta agonist; FEV<sub>1</sub> = Forced expiratory volume in 1 second; SPT = Skin prick test; PC<sub>20</sub> MCh = Provocation concentration of methacholine causing a 20% fall in FEV<sub>1</sub>; PEF<sub>var</sub> = Peak flow variability; ACQ = Asthma Control Questionnaire; FeNO = Fractional exhaled nitric oxide; IgE = Immunoglobulin E



**Table 2: Effect of paracetamol use on BHR, lung function and asthma control**

|                                   | BASELINE            |                 | WEEK 12             |                 | Difference<br>(adjusted for<br>baseline) |
|-----------------------------------|---------------------|-----------------|---------------------|-----------------|------------------------------------------|
|                                   | Paracetamol<br>N=36 | Placebo<br>N=58 | Paracetamol<br>N=31 | Placebo<br>N=54 |                                          |
| Log 2 PC <sub>20</sub> (mg/ml)    | 1.30<br>(1.50)      | 1.09<br>(1.96)  | 0.62<br>(2.09)      | 1.07<br>(2.36)  | -0.48<br>(-1.28 to 0.32)<br>P=0.24†      |
| FEV <sub>1</sub> (L)              | 3.06<br>(0.73)      | 3.05<br>(0.83)  | 3.01<br>(0.74)      | 3.07<br>(0.86)  | -0.07<br>(-0.15 to 0.01)<br>P=0.08       |
| ACQ score                         | 0.81<br>(0.47)      | 0.93<br>(0.59)  | 0.88<br>(0.56)      | 1.03<br>(0.71)  | -0.04<br>(-0.27 to 0.18)<br>P=0.71       |
| Mean morning peak flow<br>(L/min) | 424.0<br>(83.8)     | 419.5<br>(92.3) | 417.1<br>(82.3)     | 417.5<br>(85.9) | -8.6<br>(-26.7 to 9.5)<br>P=0.35         |
| PEF <sub>var</sub> (%)            | 19.0<br>(9.3)       | 22.2<br>(10.5)  | 20.4<br>(10.3)      | 21.7<br>(11.7)  | 0.21<br>(-4.3 to 4.8)<br>P=0.93          |

Numbers are mean (SD)

**Abbreviations:**

PC<sub>20</sub> = Provocation concentration of methacholine causing a 20% fall in FEV<sub>1</sub>; FEV<sub>1</sub> = Forced expiratory volume in one second;

PEF<sub>var</sub> = PEF variability (measured as amplitude as a percentage of the mean); ACQ = Asthma Control Questionnaire;

† = Difference in doubling doses

**Table 3: Effect of paracetamol use on FeNO, blood eosinophil count and serum IgE**

|                                       | BASELINE            |                 | WEEK 12             |                 | Difference<br>(adjusted for<br>baseline)<br>P= |
|---------------------------------------|---------------------|-----------------|---------------------|-----------------|------------------------------------------------|
|                                       | Paracetamol<br>N=36 | Placebo<br>N=58 | Paracetamol<br>N=31 | Placebo<br>N=54 |                                                |
| Log FeNO (ppb)                        | 3.53<br>(0.71)      | 3.66<br>(0.78)  | 3.69<br>(0.70)      | 3.65<br>(0.76)  | 0.09<br>(-0.097 to 0.27)<br>P=0.36             |
| Log eosinophils (x10 <sup>9</sup> /L) | -1.41<br>(0.47)     | -1.27<br>(0.53) | -1.33<br>(0.54)     | -1.32<br>(0.58) | -0.056<br>(-0.25 to 0.14)<br>P=0.57            |
| Log IgE (kU/L)                        | 5.28<br>(1.52)      | 5.29<br>(1.30)  | 5.02<br>(1.56)      | 5.20<br>(1.37)  | 0.098<br>(0.009 to 0.21)<br>P=0.073            |

**Abbreviations:**

FeNO = Fractional exhaled nitric oxide; IgE = Immunoglobulin E

1  
2  
3  
4  
5  
6  
7  
8  
9  
10  
11  
12  
13  
14  
15  
16  
17  
18  
19  
20  
21  
22  
23  
24  
25  
26  
27  
28  
29  
30  
31  
32  
33  
34  
35  
36  
37  
38  
39  
40  
41  
42  
43  
44  
45  
46  
47  
48  
49  
50  
51  
52  
53  
54  
55  
56  
57  
58  
59  
60

## FIGURE LEGENDS

### Figure 1:

Study design flow chart

**Abbreviations:** SPT = Skin prick test; Preg test = pregnancy test; FEV<sub>1</sub>/FVC = Forced expiratory volume in 1 second/forced vital capacity; BHR = bronchial hyperresponsiveness testing; ACQ = Asthma Control Questionnaire; LFT = liver function test; FeNO = Fractional exhaled nitric oxide; IgE = Immunoglobulin E; FBC = full blood count

### Figure 2:

CONSORT participant flow diagram

1  
2  
3  
4  
5  
6  
7  
8 **RANDOMISED PLACEBO CONTROLLED STUDY OF THE EFFECT OF PARACETAMOL ON**  
9 **ASTHMA SEVERITY IN ADULTS**  
10

11  
12  
13  
14 <sup>1,2,3</sup>Sally ~~Eyers~~ J Ioannides, <sup>1</sup>Mathew Williams, <sup>1,2</sup>Sarah Jefferies, <sup>1,2</sup>Kyle Perrin

15  
16 <sup>2,3</sup>Mark Weatherall <sup>3</sup>Robert Siebers, <sup>3</sup>Julian Crane, <sup>1,2</sup>Mitesh Patel

17  
18 <sup>1</sup>Justin Travers, <sup>1,2</sup>Philippa Shirtcliffe, <sup>1,2</sup>Richard Beasley

19  
20  
21 <sup>1</sup>Medical Research Institute of New Zealand, Wellington, New Zealand

22  
23 <sup>2</sup>Capital & Coast District Health Board, Wellington, New Zealand

24  
25 <sup>3</sup>University of Otago Wellington, Wellington, New Zealand  
26  
27  
28

29 **Key words:** Asthma, paracetamol, randomised controlled trial, bronchial hyperresponsiveness  
30

31  
32 **Word count:** ~~3,607~~ 3,813  
33

34 **Running Title:** Effect of paracetamol on adult asthma  
35

36  
37 **Australia New Zealand Clinical Trials Registry Number:** ANZCTR12609000551291  
38

39 **Central Regional Ethics Committee Number:** CEN/08/12/070  
40  
41  
42

43 **Correspondence:**

44  
45 Prof Richard Beasley  
46 Medical Research Institute of New Zealand  
47 Private Bag 7902, Wellington 6242  
48 New Zealand  
49 Telephone: 64-4-805 0230  
50 Fax: 64-4-389 5707  
51 Email: richard.beasley@mrinz.ac.nz  
52  
53  
54  
55

56 | [BMJ Open – RCT paracetamol – ~~4/10/13~~ 18/12/13]  
57  
58  
59  
60

Page 1

**ABSTRACT (word count 250249)**

**Background:** Epidemiological evidence suggests that paracetamol may be a risk factor in the development of asthma and its severity. This is the first randomised placebo-controlled trial of the effect of regular paracetamol on bronchial hyperresponsiveness (BHR) and asthma control in adult asthma.

**Methods:** In a 12-week randomised, double-blind, placebo-controlled, parallel-group study, 94 adults with mild to moderate asthma received 12 weeks of 1g paracetamol twice daily or placebo twice daily. The primary outcome variable was bronchial hyperresponsivenessBHR, measured as the provocation concentration of methacholine causing a 20% fall in FEV<sub>1</sub> (PC<sub>20</sub>MCh), at week 12. Secondary outcome variables included FEV<sub>1</sub>, FeNO and ACQ score.

**Results:** 94 participants received randomised treatment (36 and 58 in the paracetamol and placebo groups respectively); 85 participants completed the study. At 12 weeks the mean (SD) logarithm base two PC<sub>20</sub> was 1.07 (2.36) in the control group (N=54) and 0.62 (2.09) in the paracetamol group (N=31). After controlling for baseline PC<sub>20</sub>, the mean difference (paracetamol minus placebo) was -0.48 doubling dose worsening in BHR in the paracetamol group (95% CI -1.28 to 0.32), P=0.24. There were no statistically significant differences (paracetamol minus placebo) in log FeNO 0.09 (95% CI -0.097 to 0.27)), FEV<sub>1</sub> (-0.07 L (95% CI -0.15 to 0.01)), or ACQ score (-0.04 (95% CI -0.27 to 0.18)).

**Conclusions:** There was no significant effect of paracetamol on bronchial responsivenessBHR and asthma control in adults with mild to moderate asthma. However, the study findings are limited by low power and the upper confidence interval limits did not rule out a clinically relevant adverse effects.

## STRENGTHS AND WEAKNESSES

- Randomised placebo-controlled trial
- Physiological, clinical and immunological outcome measures
- Powered to detect a marked effect on BHR

## KEY MESSAGES

### What is the key question?

Does regular paracetamol use result in worsening asthma severity?

### What is the bottom line?

Paracetamol use did not cause a marked increase in bronchial hyperresponsiveness or [deterioration in](#) asthma control in [adults with](#) asthma, although it was not possible to rule out a clinically relevant effect.

### Why read on?

This is the first randomised placebo-controlled trial to measure the effects of paracetamol in stable adult asthma. The study findings provide information on which the design of further studies can be based.

## ADDITIONAL DATA

There are no additional data available.

## CONTRIBUTORSHIP STATEMENT:

[S-Eyers](#), [J Ioannides](#) was principal investigator and contributed to study planning, study conduct, data analysis and manuscript preparation. K Perrin contributed to study planning, study conduct and manuscript preparation, M Williams, S Jefferies and M Patel contributed to study conduct, M Weatherall contributed to randomisation, statistical analysis and preparation of manuscript, R Siebers contributed to blood analysis and preparation of manuscript, J Crane contributed to study planning and manuscript preparation, J Travers and P Shirtcliffe were safety investigators and R Beasley contributed to study planning, study conduct, data analysis and manuscript preparation.

1  
2  
3  
4  
5  
6  
7  
8  
9  
10  
11  
12  
13  
14  
15  
16  
17  
18  
19  
20  
21  
22  
23  
24  
25  
26  
27  
28  
29  
30  
31  
32  
33  
34  
35  
36  
37  
38  
39  
40  
41  
42  
43  
44  
45  
46  
47  
48  
49  
50  
51  
52  
53  
54  
55  
56  
57  
58  
59  
60

|

For peer review only

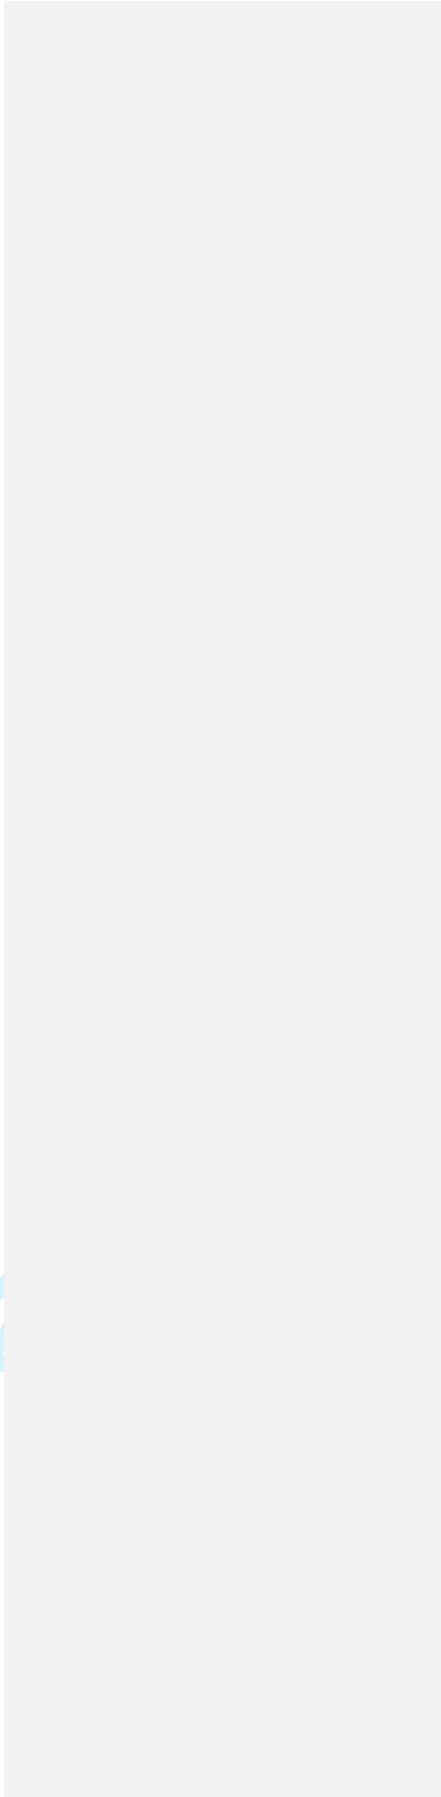

## INTRODUCTION

There is a growing body of evidence to suggest that paracetamol may play an important role as a risk factor for the development of asthma, and that increasing world-wide use may have contributed to the increasing global prevalence of asthma seen over the last 40 years.[1,2]

Childhood asthma risk increases in the offspring of women who consume paracetamol during pregnancy,[3] and paracetamol use in the first 12 months of life is associated with an increased risk of wheezing at 3 years [4,5] and 6-7 years.[6] Cross-sectional surveys in children,[6] adolescents [7] and adults [8-11] consistently demonstrate an association between current paracetamol use and asthma in populations with widely differing lifestyles, standards of living, medical practice and availability of paracetamol. However, there is also evidence that these associations may, in part, be due to confounding by indication in some,[12-14] but not all cohort studies in childhood.[15] Cohort studies in adults have demonstrated that increasing frequency of paracetamol use is positively associated with newly-diagnosed (adult-onset) asthma.[16,17]

There is also evidence that paracetamol may increase the severity of asthma in those with the disease. This primarily comes from the only randomised controlled trial of the effect of paracetamol use for fever and asthma outcomes, in which asthmatic children experiencing a current febrile illness were randomised to receive either paracetamol or ibuprofen.[18] The children who received paracetamol were more likely to require an outpatient visit for asthma compared to children in the ibuprofen group. The increased risk with paracetamol was dose dependent and related to respiratory febrile illnesses rather than other causes of fever. In a case-control study which reported a dose-dependent association between paracetamol use and asthma, a progressively greater risk in those with more severe disease was noted, suggesting an effect on both causation and severity of the disease.[10]

The mounting epidemiological evidence, supported by several biologically plausible mechanisms [19-28] has led to repeated calls [2,5-7,13,29-32] for randomised controlled trials to be undertaken



1  
2  
3  
4  
5  
6 to explore the relationship between paracetamol and asthma. This study is the first randomised  
7 controlled trial undertaken to investigate the effect of regular daily paracetamol on asthma severity  
8 in adult patients with asthma. It was powered to detect a one doubling dose change in PC<sub>20</sub>  
9 methacholine bronchial hyperresponsiveness (BHR). Markers of airways inflammation and  
10 systemic immunological responses were monitored to provide insight into possible mechanisms of  
11 action. The hypothesis was that regular paracetamol use would result in a worsening in BHR and  
12 asthma control.  
13  
14  
15  
16  
17  
18  
19  
20  
21  
22  
23  
24  
25  
26  
27  
28  
29  
30  
31  
32  
33  
34  
35  
36  
37  
38  
39  
40  
41  
42  
43  
44  
45  
46  
47  
48  
49  
50  
51  
52  
53  
54  
55

## METHODS

The study design was a double-blind, randomised, placebo-controlled, parallel group trial based in Wellington, New Zealand. The study methods are summarised with additional details provided in the supplementary appendix. The study was approved by the Central Regional Ethics Committee (CEN/08/12/070) and all participants gave written informed consent. The trial was registered on the Australian New Zealand Clinical Trials Registry (ACTRN12609000551291).

### Participants

Participants were identified from the Medical Research Institute of New Zealand (MRINZ) asthma register, general practitioner patient databases, and the general public through advertising.

Inclusion criteria included age between 18 and 65 years, wheeze in the previous 12 months and a doctor's diagnosis of asthma, forced expiratory volume in 1 second (FEV<sub>1</sub>)  $\geq$ 70% predicted at screening and baseline and a PC<sub>20</sub> MCh (the provocation concentration of methacholine causing a 20% reduction in FEV<sub>1</sub>) of between 0.125 and 16 mg/ml at baseline. Exclusion criteria included regular use of theophylline, ipratropium bromide, tiotropium or leukotriene receptor antagonists in the previous 3 months, alanine aminotransferase (ALT) levels greater than 1.5 times the upper limit of normal at baseline, a history of liver disease or the current use of hepatotoxic drugs, an exacerbation of asthma within the previous two months requiring prednisone or nebulised bronchodilator, current or past cigarette smoking >10 pack years, history of sensitivity or allergy to paracetamol or current regular use of paracetamol, use of high-dose aspirin or non-steroidal anti-inflammatory drugs, history of alcoholism or current excessive alcohol intake, history of previous intentional overdose of paracetamol, previous suicide attempt or current unstable depression, body mass index <16 kg/m<sup>2</sup>, pregnant or breast-feeding women or women not using adequate contraception and participants unsuitable for BHR challenge testing in accordance with American Thoracic Society (ATS) criteria.[33]

### Interventions

1  
2  
3  
4  
5  
6 Participants were randomised to receive one of two treatment regimens for 12 weeks. The  
7 treatments were paracetamol 1g, administered as two 500mg tablets, or placebo administered as  
8 two identically appearing tablets, taken twice daily. The paracetamol and placebo tablets were  
9 supplied by Aspen Asia Pacific Ltd, Sydney, Australia. All participants were instructed to avoid  
10 taking other forms of paracetamol (including over-the-counter remedies containing paracetamol) or  
11 non-steroidal anti-inflammatory drugs (NSAIDs) for the duration of the study. All participants were  
12 provided with a prescription for codeine to use as an analgesic during the study.  
13  
14  
15  
16  
17  
18  
19

Formatted: Plain Text

### 20 Randomisation

21 A computer-generated randomisation schedule was generated by the study statistician and was  
22 administered by the study pharmacists. It was necessary to randomise the participants prior to  
23 their final eligibility screening visit (visit 2) to enable the study pharmacists adequate time to  
24 prepare the study medication for dispensing at visit 2 following final determination of eligibility. If a  
25 participant failed one of the eligibility criteria at visit 2, the randomised medication was not  
26 dispensed and the participant was withdrawn from the study. The randomisation code was not re-  
27 used.  
28  
29  
30  
31  
32  
33  
34

### 35 Blinding

36 Study investigators, participants, and participant health care providers were blinded through  
37 provision of medication as identically appearing tablets in bottles, with neither the investigator  
38 dispensing the medication or the participants aware of the allocated treatment.  
39  
40  
41  
42  
43

### 44 Design

45 The trial involved four study clinic visits and between two and four additional blood tests over 13  
46 weeks (Figure 1). A screening visit (visit 1) was held approximately one week prior to baseline and  
47 consisted of a medical history and brief physical examination, pregnancy test where applicable,  
48 bronchodilator reversibility testing, liver function screen and allergy skin prick tests (see online  
49 supplement for details). A diary was used to record morning and evening peak expiratory flow  
50  
51  
52  
53  
54  
55

56 | [BMJ Open – RCT paracetamol – ~~4/10/13~~18/12/13]

Page 8

1  
2  
3  
4  
5  
6 (PEF) values (prior to asthma medication use) for one week prior to the second visit. Participants  
7 who met initial eligibility criteria were randomised at this stage, prior to final eligibility assessment  
8 at visit 2.  
9

10  
11  
12 At visit 2, designated the baseline visit, the Qoltech asthma control questionnaire (ACQ)[34] was  
13 administered and  $PEF_{var}$  (PEF variability measured as the amplitude as a percentage of the mean)  
14 calculated. Baseline assessments of  $FEV_1$  were undertaken using a Micro Medical Microlab  
15 spirometer (Micro Medical, Kent, UK) and Fractional exhaled Nitric Oxide (FeNO) was assessed  
16 using a NiOX Flex chemiluminescence analyser (Aerocrine AB, Stockholm, Sweden).  
17  
18 Methacholine (Methapharm, Ontario, Canada) challenge testing was undertaken via the two-  
19 minute tidal breathing dosing protocol recommended by the ATS,[33] as outlined in the online  
20 supplement. Participants who met all the eligibility criteria were then dispensed a six-week supply  
21 of randomised medication, a medication diary to record administered doses and a prescription for  
22 codeine phosphate for emergency pain relief during the trial period. These participants then  
23 underwent blood tests including full blood count (eosinophils), total serum immunoglobulin E (IgE),  
24 and serum cytokine levels (interferon (IFN)- $\gamma$ , interleukin (IL)-4, IL-5, IL-13) (see online supplement  
25 for details).  
26  
27  
28  
29  
30  
31  
32  
33  
34  
35  
36

37 At visits 3 and 4, six and 12 weeks after baseline,  $FEV_1$ , ACQ, FeNO and blood tests were  
38 repeated and medication compliance checked via pill count and medication diary check (see online  
39 supplement for details). At the third visit, participants were given a further six-week supply of study  
40 medication, a second medication diary, and a diary to record morning and evening PEF values in  
41 the final intervention week. At the fourth and final visit, BHR testing was repeated. Liver function  
42 tests were monitored throughout the study (see online supplement for details).  
43  
44  
45  
46  
47  
48

## 49 Outcomes

50  
51 The primary outcome variable was  $PC_{20}$  MCh at 12 weeks, adjusted for baseline. [This direct](#)  
52 [measure of BHR was chosen as an objective well standardised physiological measure of asthma](#)  
53  
54

severity, recommended for monitoring the effects of therapy which may modify asthma

severity.<sup>[33,35]</sup> Secondary outcome measures were FEV<sub>1</sub>, FEV<sub>1</sub> % predicted, ACQ score and FeNO at six and 12 weeks, and the mean morning peak flow, PEF<sub>var</sub>, and exacerbations of asthma (requiring a doctor's visit and need for prednisone or nebulised bronchodilator) at 12 weeks. Blood eosinophil, serum IgE, and serum cytokine (IFN- $\gamma$ , IL-4, IL-5 and IL-13) levels were measured at six and 12 weeks.

### Statistical Methods

The primary analysis method was ANCOVA. The logarithm base two PC<sub>20</sub> for methacholine at 12 weeks was the primary response variable, with the baseline logarithm base two PC<sub>20</sub> as a covariate, and a categorical variable for the paracetamol group. The difference in logarithm base two PC<sub>20</sub> was the doubling dose difference between the two randomised groups. Secondary outcome variables, including FEV<sub>1</sub>, FEV<sub>1</sub> % predicted, ACQ score, FeNO, mean morning peak flow and PEF<sub>var</sub> were also analyzed by ANCOVA. The distribution of FeNO, serum IgE and eosinophil count was skewed and normality assumptions for these variables were best met on the natural logarithm scale.

The proportion of participants with at least one asthma exacerbation was compared as an absolute risk difference, with an appropriate confidence interval, because in the event there were no asthma exacerbations in one of the randomised groups so that a relative risk could not be calculated.

Simple t-tests were used to compare mean values for ALT by randomised group. FeNO, eosinophil count and IgE were logarithm transformed because of skewed distributions, and the difference in logarithms was compared by a t-test. For those three variables with a logarithm transformation, the exponent of the difference in logarithms is interpreted as the ratio of mean values. A risk difference and appropriate confidence intervals were calculated for the categorical variable, the number of participants with at least one asthma exacerbation. Simple t tests were used to compare mean values for ALT, the logarithm transformed FeNO, eosinophil count and IgE by paracetamol or placebo group, as the latter three had skewed distributions. For those variables with a logarithm

Formatted: Font: 11 pt

1  
2  
3  
4  
5  
6 ~~transformation, the exponent of the difference in logarithms was interpreted as the ratio of mean~~  
7 ~~values.~~  
8  
9

10  
11 The analysis was by intention to treat of randomised participants who passed the final eligibility  
12 screening and as a result received randomised treatment. No randomised participants who failed  
13 the final eligibility screen received randomised treatment or underwent any outcome assessments.  
14  
15 For each individual analysis, a two-sided P value of 0.05 was used, with 95% confidence intervals  
16 for each estimate. We have not adjusted for multiple statistical testing.  
17  
18  
19  
20  
21  
22  
23  
24  
25  
26  
27  
28  
29  
30  
31  
32  
33  
34  
35  
36  
37  
38  
39  
40  
41  
42  
43  
44  
45  
46  
47  
48  
49  
50  
51  
52  
53  
54  
55

**Sample Size**

A sample size of 60 in each group has 80% power at the 5% level of significance to detect a difference of one doubling dose in PC<sub>20</sub> MCh between the groups, based on a standard deviation of 1.9.<sup>[3536]</sup> To allow for the possibility of up to 10% of study participants withdrawing early from the study, a recruitment target of 66 participants was set for each group.

For peer review only

## RESULTS

Recruitment commenced in June 2009 and ended in September 2011. The planned study period of two years was extended by three months due to difficulties in recruitment. Figure 2 shows the flow of participants. There were 724 patients assessed for eligibility at phone screening and/or visit 1; of these, 338 failed to meet the inclusion criteria and 205 declined to participate (see online supplement). There were 181 participants randomised prior to visit 2 based on initial eligibility at visit 1; 91 to the paracetamol group and 92 to the placebo group. 53/91 participants allocated to the paracetamol group and 34/92 allocated to the placebo group were withdrawn at visit 2 as they either did not meet the inclusion/exclusion criteria ( $PC_{20} > 16\text{mg/ml}$ ,  $n=68$ ;  $PC_{20} < 0.125\text{mg/ml}$ ,  $n=3$ ;  $FEV_1 < 70\%$  predicted,  $n=6$ ; unable to perform spirometry,  $n=1$ ) or were lost to follow-up or withdrew consent ( $n=9$ ). No study medication was dispensed to the participants who were withdrawn at visit 2 (see online supplement).

Medication was dispensed to 94 participants who commenced the intervention phase following visit 2: 36 randomised to paracetamol and 58 to placebo. The characteristics of the subjects are shown in Table 1. The mean age of participants was 40 years and there were 59 female participants. Approximately 30% of study participants were prescribed inhaled corticosteroids and 18% prescribed long-acting beta agonist drugs. Around 90% of participants had positive skin prick tests to either cat, mixed grass or house dust mite. Participants had mild to moderate asthma, with a baseline ACQ score of 0.86 (SD 0.59). The baseline mean FeNO was 48.9 ppb (SD 41.3) and the mean  $FEV_1$  was 94% of predicted (SD 12.0). The baseline mean  $PC_{20}$  was 4.29 mg/ml (SD 4.54).

There were 85/94 participants who completed the study. Five participants were withdrawn from the paracetamol group; two withdrew at the participant's own discretion, one was excluded due to a raised ALT (119 IU/L), one was lost to follow-up and one was excluded due to intercurrent illness. Four participants were withdrawn from the placebo group; two were excluded due to a raised ALT



(207 and 227 IU/L respectively), one withdrew at the participant's own discretion and one was lost to follow-up.

### Primary Outcome Variable

At 12 weeks the mean (SD) logarithm base two PC<sub>20</sub> was 1.07 (2.36) in the control group (N=54) and 0.62 (2.09) in the paracetamol group (N=31). After controlling for baseline PC<sub>20</sub>, the difference (expressed as a doubling dose difference, paracetamol minus placebo) was not statistically significant: -0.48 (95% CI -1.28 to 0.32), P=0.24 (Table 2).

### Secondary Outcome Variables

There were no statistically significant differences in FEV<sub>1</sub>, FEV<sub>1</sub> % predicted, ACQ score, mean morning peak flow or PEF<sub>var</sub> between the control and paracetamol groups at Week 12 (Table 2) or in FEV<sub>1</sub> or ACQ score at Week 6 (Online Supplement). There were three asthma exacerbations in the placebo group and none in the paracetamol group, an absolute difference of 5.6% (95% CI -0.5 to 11.7%). There was 93.2% compliance in the control group and 90.8% compliance in the paracetamol group when assessed by pill count and medication diaries, a difference of 2.4%, (95% CI -1.0 to 5.8). Serum paracetamol levels (greater than the 30 µmol/L threshold) were detectable in between 31.3 to 38.7% of participants in the paracetamol group and were undetectable in all participants in the placebo group between week 2 and week 12 of the study.

There were no statistically significant differences observed in log FeNO at Week 6 (see Online Supplement), or at Week 12, or in log eosinophil or log IgE levels between the two groups at week 12 (Table 3). Only a proportion of participants had measurable levels of IFN- $\gamma$ , IL-4, IL-5 and IL-13 at baseline or at other times throughout the trial, precluding meaningful analysis (see online supplement). ALT levels were significantly higher in the paracetamol group, with a mean ALT of 25.4 (SD 9.7) and 19.0 (SD 6.0) in the paracetamol and placebo groups respectively at visit 4, difference 6.3 (95% CI 2.9 to 9.7, p <0.001).

## DISCUSSION

This double-blind, randomised, placebo-controlled, parallel group study found no statistically significant **reduction in PC<sub>20</sub>, increase in BHR** with 12-weeks paracetamol treatment. However, the results did not rule out a clinically significant effect, with the 95% confidence interval containing the pre-specified difference of one doubling dose reduction in PC<sub>20</sub>. There were no significant differences observed in any of the pre-specified secondary outcome variables of asthma control, inflammatory or immunological markers.

This is the first reported randomised placebo-controlled trial of the effects of daily paracetamol in stable adult asthma. The only other published randomised controlled trial of paracetamol and asthma was the Boston University Fever Study.[18] Children randomised to the ibuprofen group had a reduced risk of having an outpatient visit for asthma during the 4 week study period (OR 0.56, 95% CI 0.34 to 0.95) compared with children in the paracetamol group. Because the study did not include a placebo treatment, it was not possible to determine whether the observed difference in morbidity according to treatment group was attributable to an increased risk with paracetamol or a decreased risk with ibuprofen.

There are several methodological issues relevant to the interpretation of our study findings. First, as enshrined in the Declaration of Helsinki [3637] there is a requirement to study the least vulnerable populations wherever applicable. Most, but not all, of the putative adverse effects of paracetamol on asthma have been shown in observational studies of children and suggest that paracetamol may increase the risk of developing asthma.[1,2] However, as there is some data to suggest that regular paracetamol use may lead to a deterioration in asthma control in adults,[1,10] we opted to firstly examine the effects of paracetamol in adults with stable asthma.

Second, this trial was powered to determine whether there was an effect on BHR of at least one-doubling dose reduction in PC<sub>20</sub> MCh. Our ability to achieve the designated sample size completing

1  
2  
3  
4  
5  
6 the study was affected by several factors. First, despite a rigorous recruitment campaign during  
7 which over 700 patients were screened, due to the inclusion and exclusion criteria employed to  
8 ensure participant safety, only 94 screened participants were dispensed randomised medication.  
9  
10 Secondly, variability in PC<sub>20</sub> from baseline to week 12 was larger than anticipated, with a pooled  
11 SD of 2.27 doubling doses compared to that used in the sample size calculation based on a SD of  
12 1.9, derived from previous studies.<sup>[3536]</sup> Another factor which affected the study power was the  
13 requirement to randomise subjects prior to their final screening visit in order to allow the pharmacy  
14 adequate time for dispensing at visit 2, following final determination of eligibility. If the participant  
15 failed this final eligibility, the randomised medication was not dispensed, the participant was  
16 withdrawn from the study, and the randomisation code was not reused. By chance this resulted in  
17 a disparity between the proportion of participants receiving active or placebo study medication. The  
18 power was reduced further due to the withdrawal of 10% of participants following randomisation.  
19 As there is an uncertain association between observed variables and missing BHR data in these  
20 participants, it was not possible to perform a robust imputation.

21  
22 Compliance was high when measured via pill count, and although less than half of participants in  
23 the paracetamol group had measurable levels of paracetamol in the blood at the times tested  
24 throughout the study, this is likely to be due to the laboratory cut-off for a detectable paracetamol  
25 level (30 µmol/L). Following a 1g dose, participant blood levels may fall below this laboratory cut-  
26 off level in as little as 3 hours (given an paracetamol half-life of 2 hours and a peak plasma  
27 concentration 1 hour after administration of 80 µmol/L <sup>[3738]</sup>). The use of this laboratory cut-off for  
28 paracetamol levels meant that it was not possible to investigate medication compliance through  
29 this method.

30  
31 Our 12-week dosing period was chosen based on evidence that regular, long-term use of  
32 paracetamol is associated with an increased risk of asthma in adults [9-11,16,17] and that chronic  
33 ingestion of therapeutic doses can reduce serum antioxidant capacity in as little as two  
34 weeks.<sup>[3839]</sup> We had originally intended to use the maximum daily dose of 4g paracetamol,  
35  
36

1  
2  
3  
4  
5  
6 however chose to administer half this dose due to concerns of liver toxicity. These concerns were  
7 based on a previous clinical trial of paracetamol in which the incidence of ALT elevations more  
8 than three times the upper limit of normal in healthy participants taking 4g/day for 14 days was 31  
9 to 44%.<sup>[3940]</sup> Our results showed no clinically significant liver function derangement with  
10 paracetamol administered at a dose of 2g/day for 12 weeks.  
11  
12  
13  
14

15  
16 Whilst the study did not demonstrate a statistically significant effect of paracetamol on BHR to  
17 MCh, the results do not rule out a clinically significant effect, with the upper 95% confidence  
18 interval of a 1.28 doubling-dose worsening in BHR containing the pre-specified difference of one  
19 doubling-dose. Furthermore, our point estimate of a reduction in PC<sub>20</sub> of 0.48 of a doubling-dose  
20 could potentially be of major public health significance. As proposed by Mitchell,<sup>[4041]</sup> a small shift  
21 to the left of the BHR curve in a population could lead to a relatively large increase in the  
22 prevalence of severe asthma. Relevant to the interpretation of our findings it has recently been  
23 calculated that a one half doubling dose increase in BHR increases the prevalence of moderate  
24 and severe BHR by about 30%.<sup>[4142]</sup> Likewise, although the 9% increase in FeNO with  
25 paracetamol was not statistically significant, a change of this magnitude is considered clinically  
26 significant.<sup>[4243]</sup> For FEV<sub>1</sub>, the point estimate was consistent with a lower value in the  
27 paracetamol group, however the difference was of uncertain clinical significance and was  
28 associated with wide confidence intervals.  
29  
30  
31  
32  
33  
34  
35  
36  
37  
38  
39

40 No significant effect was seen on serum IgE or peripheral blood eosinophil levels. It was not  
41 possible to undertake any meaningful analysis of the cytokine measurements, due to the low  
42 numbers of participants with detectable levels, and as a result we were unable to determine if  
43 paracetamol influenced the Th1/Th2 balance. Another less recognised potential mechanism of  
44 action, which was not directly assessed in this study, relates to neurogenic inflammation of the  
45 airways through the stimulation of the transient receptor potential ankyrin-1 (TRPA-1) cation  
46 channel by NAPQI, the metabolite of paracetamol.<sup>[26]</sup> This pathway, which is activated following  
47 therapeutic doses of paracetamol, mediates a non-eosinophilic inflammatory response and has  
48  
49  
50  
51  
52  
53  
54

1  
2  
3  
4  
5  
6 been implicated in the pathogenesis or provocation of asthma by isocyanates, aldehydes, cigarette  
7 smoke and chlorine.<sup>[4344,4445]</sup>  
8  
9

10  
11 Our findings provide information on which the design of further studies could be based. A trial of  
12 similar design, utilising the same duration and dose of paracetamol and with BHR testing to MCh  
13 as the primary outcome variable, based on the standard deviation derived from this study, would  
14 require a sample size of approximately 650 to attain adequate power to detect a difference of 0.5  
15 doubling-doses. Alternatively, a study of short-term use of paracetamol at higher doses could be  
16 undertaken, to more closely replicate the common use of paracetamol for relief of fever or pain in  
17 self-limited illnesses. Based on our findings, a sample size of 140 would be adequate to determine  
18 a 0.5 doubling-dose difference in MCh BHR, and a 10% increase in FeNO, in a short-term study of  
19 cross-over design. Important issues with the design of such a study are the duration of both the  
20 treatment periods and the crossover period. It would be important if possible to include a placebo  
21 rather than ibuprofen arm, as NSAIDs may have the potential to both cause NSAID-induced  
22 bronchospasm, as well as reducing asthma severity with long term use.<sup>[29]</sup>  
23  
24  
25  
26  
27  
28  
29  
30  
31  
32

33  
34 Finally, our study investigated the effect of paracetamol on asthma severity and not whether  
35 paracetamol has a role in the pathogenesis of asthma. Testing this hypothesis would require a  
36 clinical trials both of the effect of paracetamol use in pregnancy on the development of asthma in  
37 childhood, and the effect of paracetamol use in infants and older children and subsequent asthma  
38 risk. , which Such studies would raise ethical and practical issues regarding consent and the use of  
39 placebo for the management of pain or fever during pregnancy and- in young children. However  
40 given the common usage of paracetamol in all age groups including pregnancy and the global  
41 burden of asthma, we propose that randomised controlled trials are required to determine the  
42 effect of paracetamol use on the development of asthma in infancy and early childhood.  
43  
44  
45  
46  
47  
48  
49  
50

51 In conclusion, this study has shown no significant effect of 12 weeks of treatment with paracetamol  
52 at half the maximum therapeutic daily dose on BHR and asthma control in adults with well  
53  
54

1  
2  
3  
4  
5  
6 controlled asthma. Whilst this outcome provides some reassurance that regular paracetamol use  
7 has no marked deleterious effect in adult asthma, further adequately powered studies are needed  
8 before the safety of paracetamol for patients with asthma is assured. Furthermore, the study  
9 findings do not preclude an effect of paracetamol on the development of asthma in infancy,  
10 childhood or adult life.  
11  
12  
13  
14  
15  
16  
17  
18  
19  
20  
21  
22  
23  
24  
25  
26  
27  
28  
29  
30  
31  
32  
33  
34  
35  
36  
37  
38  
39  
40  
41  
42  
43  
44  
45  
46  
47  
48  
49  
50  
51  
52  
53  
54  
55

For peer review only

**COMPETING INTERESTS**

R Beasley has been a member of the GlaxoSmithKline (NZ) Advisory Board, and received research grants, payment for lectures or support to attend meetings from GlaxoSmithKline, a manufacturer of paracetamol.

**FUNDING**

[S-Eyers](#), [J Ioannides](#) is a Health Research Council Clinical Research Training Fellow. Funding for the study was through research grants from the Health Research Council of New Zealand, the Wellington Medical Research Foundation, the Asthma and Respiratory Foundation of New Zealand, and the University of Otago.

## REFERENCES

1. Farquhar H, Stewart A, Mitchell E, et al. The role of paracetamol in the pathogenesis of asthma. *Clin Exp Allergy* 2010;**40**:32-41.
2. McBride JT. The Association of Acetaminophen and Asthma Prevalence and Severity. *Pediatrics* 2011;**128**:1181-5.
3. Evers S, Weatherall M, Jefferies S, Beasley R. Paracetamol in pregnancy and the risk of wheezing in offspring: a systematic review and meta-analysis. *Clin Exp Allergy* 2011;**41**:482-9.
4. Shaheen SO, Newson RB, Sherriff A, et al. Paracetamol use in pregnancy and wheezing in early childhood. *Thorax* 2002;**57**:958-63.
5. Amberbir A, Medhin G, Alem A, et al. The role of acetaminophen and geohelminth infection on the incidence of wheeze and eczema: a longitudinal birth-cohort study. *Am J Respir Crit Care Med* 2010;**183**:165-70.
6. Beasley R, Clayton T, Crane J, et al. Association between paracetamol use in infancy and childhood, and risk of asthma, rhinoconjunctivitis, and eczema in children aged 6-7 years: analysis from Phase Three of the ISAAC programme. *Lancet* 2008;**372**:1039-48.
7. Beasley RW, Clayton TO, Crane J, et al. Acetaminophen use and risk of asthma, rhinoconjunctivitis and eczema in adolescents: ISAAC Phase Three. *Am J Respir Crit Care Med* 2011;**183**:171-8.
8. Davey G, Berhane Y, Duncan P, et al. Use of acetaminophen and the risk of self-reported allergic symptoms and skin sensitization in Butajira, Ethiopia. *J Allergy Clin Immunol* 2005;**116**:863-8.
9. McKeever TM, Lewis SA, Smit HA, et al. The association of acetaminophen, aspirin, and ibuprofen with respiratory disease and lung function. *Am J Respir Crit Care Med* 2005;**171**:966-71.
10. Shaheen SO, Sterne JA, Songhurst CE, Burney PG. Frequent paracetamol use and asthma in adults. *Thorax* 2000;**55**:266-70.



11. Shaheen S, Potts J, Gnatiuc L, et al. The relation between paracetamol use and asthma: a GA2LEN European case-control study. *Eur Respir J* 2008;**32**:1231-6.
12. Schnabel E, Heinrich J. Respiratory tract infections and not paracetamol medication during infancy are associated with asthma development in childhood. *J Allergy Clin Immunol* 2010;**126**:1071-3.
13. Tapiainen T, Dunder T, Mottonen M, et al. Adolescents with asthma or atopic eczema have more febrile days in early childhood: a possible explanation for the connection between paracetamol and asthma? *J Allergy Clin Immunol* 2010;**125**:751-2.
14. Lowe AJ, Carlin JB, Bennett CM, et al. Paracetamol use in early life and asthma: prospective birth cohort study. *BMJ* 2010;**341**:c4616.
15. Kreiner-Møller E, Sevelsted A, Vissing NH, et al. Infant acetaminophen use associates with early asthmatic symptoms independently of respiratory tract infections: The Copenhagen Prospective Study on Asthma in Childhood 2000 (COPSAC<sub>2000</sub>) cohort. *J Allergy Clin Immunol* 2012;**130**:1434-6.
16. Barr RG, Wentowski CC, Curhan GC, et al. Prospective study of acetaminophen use and newly diagnosed asthma among women. *Am J Respir Crit Care Med* 2004;**169**:836-41.
17. Thomsen SF, Kyvik KO, Skadhauge L, et al. Intake of paracetamol and risk of asthma in adults. *J Asthma* 2008;**45**:675-6.
18. Lesko SM, Louik C, Vezina RM, Mitchell AA. Asthma morbidity after the short-term use of ibuprofen in children. *Pediatrics* 2002;**109**:E20.
19. Rahman I, MacNee W. Oxidative stress and regulation of glutathione in lung inflammation. *Eur Respir J* 2000;**16**:534-54.
20. Chen TS, Richie JP Jr, Lang CA. Life span profiles of glutathione and acetaminophen detoxification. *Drug Metab Dispos* 1990;**18**:882-7.
21. Dimova S, Hoet P, Dinsdale D, Nemery B. Acetaminophen decreases intracellular glutathione levels and modulates cytokine production in human alveolar macrophages and Type II pneumocytes in vitro. *Int J Biochem Cell Biol* 2005;**37**:1727-37.

- 1  
2  
3  
4  
5  
6 22. Kozer E, Evans S, Barr J, et al. Glutathione, glutathione-dependent enzymes and  
7 antioxidant status in erythrocytes from children treated with high-dose paracetamol. *Br J Clin*  
8 *Pharmacol* 2003;**55**:234-40.
- 9  
10  
11 23. Micheli L, Cerretani D, Fiaschi AI, et al. Effect of acetaminophen on glutathione levels in rat  
12 testis and lung. *Environ Health Perspect* 1994;**102(Suppl 9)**:63-4.
- 13  
14 24. Eneli I, Sadri K, Camargo C Jr, Barr RG. Acetaminophen and the risk of asthma: the  
15 epidemiologic and pathophysiologic evidence. *Chest* 2005;**127**:604-12.
- 16  
17 25. Lenney W, Fryer AA. The genetics of asthma: are the glutathione S-transferases serious  
18 players? *Clin Exp Allergy* 2007;**37**:1124-6.
- 19  
20 26. Nassini R, Materazzi S, Andre E, et al. Acetaminophen, via its reactive metabolite N-acetyl-  
21 p-benzo-quinoneimine and transient receptor potential ankyrin-1 stimulation, causes  
22 neurogenic inflammation in the airways and other tissues in rodents. *FASEB J*  
23 2010;**24**:4904-16.
- 24  
25 27. Peterson JD, Herzenberg LA, Vasquez K, Waltenbaugh C. Glutathione levels in antigen-  
26 presenting cells modulate Th1 versus Th2 response patterns. *Proc Natl Acad Sci USA*  
27 1998;**95**:3071-6.
- 28  
29 28. Prymula R, Siegrist CA, Chlibek R, et al. Effect of prophylactic paracetamol administration at  
30 time of vaccination on febrile reactions and antibody responses in children: two open-label,  
31 randomised controlled trials. *Lancet* 2009;**374**:1339-50.
- 32  
33 29. Barr RG. Does paracetamol cause asthma in children? Time to remove the guesswork.  
34 *Lancet* 2008;**372**:1011-2.
- 35  
36 30. Farquhar H, Crane J, Mitchell EA, et al. The acetaminophen and asthma hypothesis 10 years  
37 on: A case to answer. *J Allergy Clin Immunol* 2009;**124**:649-51.
- 38  
39 31. Johnson CC, Ownby DR. Have the efforts to prevent aspirin-related Reye's syndrome fuelled  
40 an increase in asthma? *Clin Exp Allergy* 2011;**41**:296-8.
- 41  
42 32. Holgate ST. The acetaminophen enigma in asthma. *Am J Respir Crit Care Med*  
43 2011;**183**:147-8.
- 44  
45  
46  
47  
48  
49  
50  
51  
52  
53  
54  
55

- 1  
2  
3  
4  
5  
6 33. American Thoracic Society. Guidelines for Methacholine and Exercise Challenge Testing  
7  
8 1999. *Am J Respir Crit Care Med* 2000;**161**:309-29.
- 9 34. Juniper EF, O'Byrne PM, Guyatt GH, et al. Development and validation of a questionnaire to  
10 measure asthma control. *Eur Respir J* 1999;**14**:902-7.
- 11  
12 ~~34-35.~~ Reddel HK, Taylor DR, Bateman ED, et al. An official American Thoracic  
13 Society/European Respiratory Society Statement: Asthma Control and Exacerbations.  
14 Standardizing Endpoints for Clinical Asthma Trials and Clinical Practice. *Am J Respir Crit*  
15 *Care Med* 2009;**180**:59-99.
- 16  
17  
18  
19  
20 ~~35-36.~~ Chinn S, Schouten JP. Reproducibility of non-specific bronchial challenge in adults:  
21 implications for design, analysis and interpretation of clinical and epidemiological studies.  
22  
23 *Thorax* 2005;**60**:395-400.
- 24  
25 ~~36-37.~~ World Medical Association: Declaration of Helsinki Ethical Principles for Medical Research  
26 Involving Human Subjects *JAMA* 2000;**284**:3043-5.
- 27  
28  
29 ~~37-38.~~ Gibb IA, Anderson BJ. Paracetamol (acetaminophen) pharmacodynamics: interpreting the  
30 plasma concentration. *Arch Dis Child* 2008;**93**:241-7.
- 31  
32 ~~38-39.~~ Nuttall SL, Khan JN, Thorpe GH, et al. The impact of therapeutic doses of paracetamol on  
33 serum total antioxidant capacity. *J Clin Pharm Ther* 2003;**28**:289-94.
- 34  
35  
36 ~~39-40.~~ Watkins PB, Kaplowitz N, Slattery JT, et al. Aminotransferase elevations in healthy adults  
37 receiving 4 grams of acetaminophen daily – A randomized controlled trial. *JAMA*  
38 2006;**296**:87-93.
- 39  
40  
41 ~~40-41.~~ Mitchell EA. Is current treatment increasing asthma mortality and morbidity? *Thorax*  
42 1989;**44**:81-4.
- 43  
44  
45 ~~41-42.~~ Weatherall M, Fingleton J, Eyers S, Beasley R. A half doubling dose change in bronchial  
46 hyperresponsiveness in a population represents an important difference. *Trans Resp Med*  
47 2013;doi:10.1186/2213-0802-1-4.
- 48  
49  
50 ~~42-43.~~ Lim KG, Mottram C. The use of fraction of exhaled nitric oxide in pulmonary practice. *Chest*  
51 2008;**133**:1232-42.
- 52  
53  
54  
55

Formatted: Font: Italic

1  
2  
3  
4  
5  
6 | 43-44. Bautista DM, Jordt SE, Nikai T, et al. TRPA1 mediates the inflammatory actions of  
7  
8 | environmental irritants and proalgesic agents. *Cell* 2006;**124**:1269-82.

9  
10 | 44-45. Caceres AI, Brackmann M, Elia MD, et al. A sensory neuronal ion channel essential for  
11  
12 | airway inflammation and hyperreactivity in asthma. *Proc Natl Acad Sci USA* 2009;**106**:9099-  
13  
14 | 104.

15  
16  
17  
18  
19  
20  
21  
22  
23  
24  
25  
26  
27  
28  
29  
30  
31  
32  
33  
34  
35  
36  
37  
38  
39  
40  
41  
42  
43  
44  
45  
46  
47  
48  
49  
50  
51  
52  
53  
54  
55  
56  
57  
58  
59  
60

For peer review only

Table 1: Characteristics of participants who received randomised treatment

|                                                | Paracetamol Group | Placebo Group     |
|------------------------------------------------|-------------------|-------------------|
| <b>Number</b>                                  | 36                | 58                |
| <b>Demographic</b>                             |                   |                   |
| Mean age, y $\pm$ SD                           | 41.5 $\pm$ 13.9   | 38.3 $\pm$ 12.5   |
| Male sex, No. (%)                              | 15 (41.7)         | 20 (34.5)         |
| Weight, Kg $\pm$ SD                            | 75.1 $\pm$ 16.7   | 77.4 $\pm$ 17.8   |
| Height, m $\pm$ SD                             | 1.7 $\pm$ 0.1     | 1.69 $\pm$ 0.11   |
| BMI, Kg/m <sup>2</sup> $\pm$ SD                | 25.9 $\pm$ 4.2    | 27.1 $\pm$ 5.8    |
| <b>Medication Use</b>                          |                   |                   |
| ICS, No. (%)                                   | 9 (25%)           | 20 (34%)          |
| SABA, No. (%)                                  | 33 (92%)          | 55 (95%)          |
| LABA, No. (%)                                  | 9 (25%)           | 8 (14%)           |
| <b>Defining Study Population</b>               |                   |                   |
| FEV <sub>1</sub> , L $\pm$ SD                  | 3.09 $\pm$ 0.78   | 3.12 $\pm$ 0.87   |
| FEV <sub>1</sub> % Predicted $\pm$ SD          | 94.1 $\pm$ 11.3   | 94.0 $\pm$ 12.4   |
| Bronchodilator Reversibility (%)               | 9.1 $\pm$ 6.0     | 7.8 $\pm$ 5.5     |
| SPT Cat pelt, No. (% +ve)                      | 20 (55.6)         | 33 (57.9)         |
| SPT D. pteronyssinus No. (% +ve)               | 30 (83.3)         | 52 (91.2)         |
| SPT Mixed grass, No. (% +ve)                   | 25 (69.4)         | 38 (66.7)         |
| SPT at least one positive, No. (% +ve)         | 33 (91.7)         | 55 (96.5)         |
| <b>Clinical and Physiological Measurements</b> |                   |                   |
| PC <sub>20</sub> MCh, mg/ml $\pm$ SD           | 4.14 $\pm$ 4.42   | 4.39 $\pm$ 4.66   |
| Mean morning peak flow, L/min $\pm$ SD         | 424.0 $\pm$ 83.8  | 419.5 $\pm$ 92.3  |
| PEF <sub>var</sub> %, $\pm$ SD                 | 19.0 $\pm$ 9.3    | 22.2 $\pm$ 10.5   |
| ACQ Score $\pm$ SD                             | 0.93 $\pm$ 0.63   | 0.82 $\pm$ 0.56   |
| <b>Inflammation and Immunology</b>             |                   |                   |
| FeNO, ppb $\pm$ SD                             | 44.9 $\pm$ 39.2   | 51.3 $\pm$ 42.6   |
| Eosinophils, x 10 <sup>9</sup> /L, $\pm$ SD    | 0.26 $\pm$ 0.12   | 0.32 $\pm$ 0.17   |
| IgE, kU/L, $\pm$ SD                            | 518.4 $\pm$ 705.7 | 480.4 $\pm$ 914.0 |

**Abbreviations:** BMI = Body mass index; ICS = Inhaled corticosteroid; SABA = Short-acting beta agonist; LABA = Long-acting beta agonist; FEV<sub>1</sub> = Forced expiratory volume in 1 second; SPT = Skin prick test; PC<sub>20</sub> MCh = Provocation concentration of methacholine causing a 20% fall in FEV<sub>1</sub>; PEF<sub>var</sub> = Peak flow variability; ACQ = Asthma Control Questionnaire; FeNO = Fractional exhaled nitric oxide; IgE = Immunoglobulin E

**Table 2: Effect of paracetamol use on BHR, lung function and asthma control**

|                                   | BASELINE            |                 | WEEK 12             |                 | Difference<br>(adjusted for<br>baseline) |
|-----------------------------------|---------------------|-----------------|---------------------|-----------------|------------------------------------------|
|                                   | Paracetamol<br>N=36 | Placebo<br>N=58 | Paracetamol<br>N=31 | Placebo<br>N=54 |                                          |
| Log 2 PC <sub>20</sub> (mg/ml)    | 1.30<br>(1.50)      | 1.09<br>(1.96)  | 0.62<br>(2.09)      | 1.07<br>(2.36)  | -0.48<br>(-1.28 to 0.32)<br>P=0.24†      |
| FEV <sub>1</sub> (L)              | 3.06<br>(0.73)      | 3.05<br>(0.83)  | 3.01<br>(0.74)      | 3.07<br>(0.86)  | -0.07<br>(-0.15 to 0.01)<br>P=0.08       |
| ACQ score                         | 0.81<br>(0.47)      | 0.93<br>(0.59)  | 0.88<br>(0.56)      | 1.03<br>(0.71)  | -0.04<br>(-0.27 to 0.18)<br>P=0.71       |
| Mean morning peak flow<br>(L/min) | 424.0<br>(83.8)     | 419.5<br>(92.3) | 417.1<br>(82.3)     | 417.5<br>(85.9) | -8.6<br>(-26.7 to 9.5)<br>P=0.35         |
| PEF <sub>var</sub> (%)            | 19.0<br>(9.3)       | 22.2<br>(10.5)  | 20.4<br>(10.3)      | 21.7<br>(11.7)  | 0.21<br>(-4.3 to 4.8)<br>P=0.93          |

Numbers are mean (SD)

**Abbreviations:**

PC<sub>20</sub> = Provocation concentration of methacholine causing a 20% fall in FEV<sub>1</sub>; FEV<sub>1</sub> = Forced expiratory volume in one second;

PEF<sub>var</sub> = PEF variability (measured as amplitude as a percentage of the mean); ACQ = Asthma Control Questionnaire;

† = Difference in doubling doses

**Table 3: Effect of paracetamol use on FeNO, blood eosinophil count and serum IgE**

|                                       | BASELINE            |                 | WEEK 12             |                 | Difference<br>(adjusted for<br>baseline)<br>P-value |
|---------------------------------------|---------------------|-----------------|---------------------|-----------------|-----------------------------------------------------|
|                                       | Paracetamol<br>N=36 | Placebo<br>N=58 | Paracetamol<br>N=31 | Placebo<br>N=54 |                                                     |
| Log FeNO (ppb)                        | 3.53<br>(0.71)      | 3.66<br>(0.78)  | 3.69<br>(0.70)      | 3.65<br>(0.76)  | 0.09<br>(-0.097 to 0.27)<br>P=0.36                  |
| Log eosinophils (x10 <sup>9</sup> /L) | -1.41<br>(0.47)     | -1.27<br>(0.53) | -1.33<br>(0.54)     | -1.32<br>(0.58) | -0.056<br>(-0.25 to 0.14)<br>P=0.57                 |
| Log IgE (kU/L)                        | 5.28<br>(1.52)      | 5.29<br>(1.30)  | 5.02<br>(1.56)      | 5.20<br>(1.37)  | 0.098<br>(0.009 to 0.21)<br>P=0.073                 |

**Abbreviations:**

FeNO = Fractional exhaled nitric oxide; IgE = Immunoglobulin E

1  
2  
3  
4  
5  
6 **FIGURE LEGENDS**  
7

8  
9 **Figure 1:**

10 Study design flow chart

11  
12  
13 **Abbreviations:** SPT = Skin prick test; Preg test = pregnancy test; FEV<sub>1</sub>/FVC = Forced expiratory  
14 volume in 1 second/forced vital capacity; BHR = bronchial hyperresponsiveness testing; ACQ =  
15 Asthma Control Questionnaire; LFT = liver function test; FeNO = Fractional exhaled nitric oxide;  
16 IgE = Immunoglobulin E; FBC = full blood count  
17  
18  
19

20  
21  
22 **Figure 2:**

23 CONSORT participant flow diagram  
24  
25  
26  
27  
28  
29  
30  
31  
32  
33  
34  
35  
36  
37  
38  
39  
40  
41  
42  
43  
44  
45  
46  
47  
48  
49  
50  
51  
52  
53  
54  
55



1  
2  
3  
4  
5  
6  
7  
8  
9  
10  
11  
12  
13  
14  
15  
16  
17  
18  
19  
20  
21  
22  
23  
24  
25  
26  
27  
28  
29  
30  
31  
32  
33  
34  
35  
36  
37  
38  
39  
40  
41  
42  
43  
44  
45  
46  
47  
48  
49  
50  
51  
52  
53  
54  
55  
56  
57  
58  
59  
60

Figure 1:

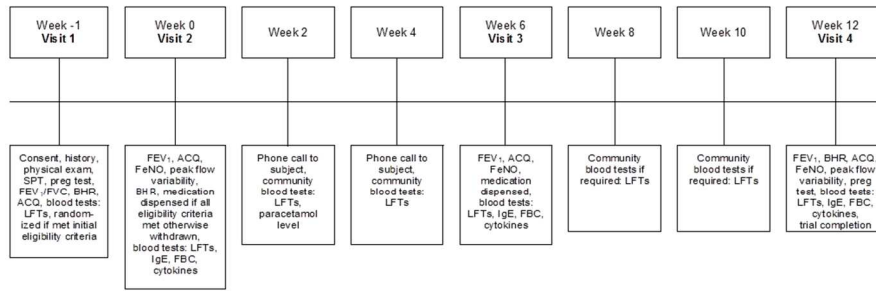

296x209mm (300 x 300 DPI)

view only

Figure 2:

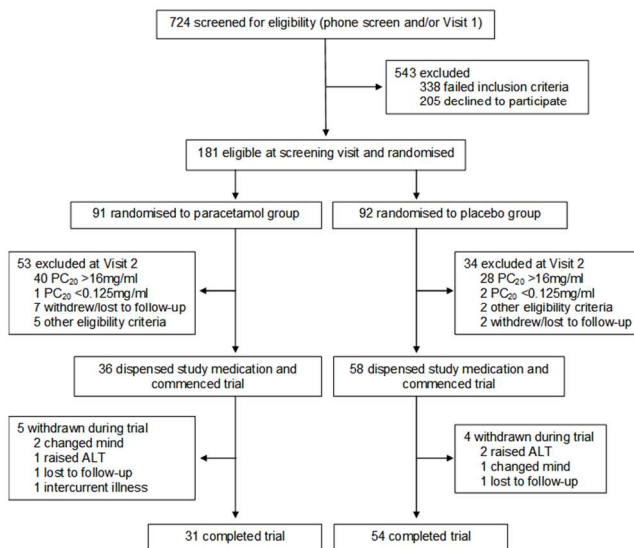

296x209mm (300 x 300 DPI)

view only

**ONLINE SUPPLEMENT****RANDOMISED PLACEBO CONTROLLED STUDY OF THE EFFECT OF  
PARACETAMOL ON ASTHMA SEVERITY**

<sup>1,2,3</sup>Sally J Ioannides, <sup>1</sup>Mathew Williams, <sup>1,2</sup>Sarah Jefferies, <sup>1,2</sup>Kyle Perrin

<sup>2,3</sup>Mark Weatherall, <sup>3</sup>Rob Siebers, <sup>3</sup>Julian Crane, <sup>1,2</sup>Mitesh Patel,

<sup>1</sup>Justin Travers, <sup>1,2</sup>Philippa Shirtcliffe, <sup>1,2</sup>Richard Beasley

<sup>1</sup>Medical Research Institute of New Zealand, Wellington, New Zealand

<sup>2</sup>Capital & Coast District Health Board, Wellington, New Zealand

<sup>3</sup>University of Otago Wellington, Wellington, New Zealand

## METHODOLOGY

### Randomisation

A computer-generated randomisation schedule was generated by the study statistician and was administered by the study pharmacists. It was necessary to randomise the subjects prior to their final eligibility screening visit (visit 2) to enable the study pharmacists adequate time to prepare the study medication for dispensing at visit 2 following final determination of eligibility. Pharmacists received notification from the study investigators that a participant was due to attend visit 2, and assigned the appropriate treatment group to the participant based on the randomisation schedule. Allocated medication was then delivered to the MRINZ research offices in labelled medication bottles, ready for dispensing to study participants at the end of visit 2 if they were eligible for the study. If a participant failed one of the eligibility criteria at visit 2, the randomised medication was not dispensed and the participant was withdrawn from the study. The randomisation code was not re-used.

### Skin Prick Testing

Skin prick testing was undertaken to grass (grass mix #7, Hollister Stier Laboratories, USA), house dust mite (*Dermatophagoides pteronyssinus*, Hollister Stier Laboratories, USA), cat pelt (Stallergenes Laboratories, France), and positive (histamine) and negative controls (Hollister Stier Laboratories, USA), performed in accordance with Australasian Society of Clinical Immunology and Allergy (ASCIA) guidelines (Australasian Society of Clinical Immunology and Allergy 2006 (Revised March 2009)).

### Methacholine Challenge Testing

Participants were asked to withhold long-acting beta-agonists (LABAs) for 48 hours and short-acting beta-agonists (SABAs) and food or drink containing caffeine for eight hours prior to BHR testing. Methacholine (provocholine) was sourced from Methapharm Inc

(Ontario, Canada) as 1280mg vials, and was diluted with normal saline in a sterile manner, and refrigerated at a concentration of 128mg/ml for a period of up to three months. Methacholine was further diluted for each individual challenge test into doubling concentrations of 0.0125, 0.03, 0.06, 0.125, 0.05, 1, 2, 4, 8, 16, and 32mg/ml and left to warm to room temperature for at least 30 minutes prior to each test. An English Wright nebuliser (Roxon Meditec, Montreal, Canada) was used to deliver the methacholine dose. Basic spirometry was performed prior to challenge testing, and a saline (diluent) dose was given prior to the first methacholine dose. At each inhaled dose, the subject was asked to breath normally through the mouthpiece (with nose clip in place) for two minutes, after which time FEV<sub>1</sub> was measured at 30s and 90s. The next concentration of methacholine was then administered within 5 minutes of the original dose commencement. If FEV<sub>1</sub> fell by  $\geq 20\%$  from baseline (or if subject finished all concentrations without a drop in FEV<sub>1</sub>), no further medication was given and nebulised salbutamol (5mg/2.5ml) was administered immediately, followed by a 10-minute rest period. The subject was monitored and salbutamol nebuliser repeated if necessary until FEV<sub>1</sub> was within 10% of post-saline baseline. PC20, defined as the provocation concentration of inhaled methacholine required to produce a 20% reduction in FEV<sub>1</sub> was calculated via the formula:

$$\text{Logarithmic PC20} = \text{Antilog} [(20-R1)(\log C2-\log C1)/(R2-R1) + \log C1]$$

where C1 is the methacholine concentration producing less than a 20% Fall in FEV<sub>1</sub> and C2 is that producing a greater than 20% fall in FEV<sub>1</sub>. R1 and R2 are the percent FEV<sub>1</sub> reductions produced by C1 and C2 respectively (Cockcroft, Murdock et al. 1983).

### Liver Function Tests

Liver function tests included alanine aminotransferase (ALT), alkaline phosphatase (ALP), bilirubin, albumin, total protein and gamma-glutamyl transferase (GGT). Any

1  
2 participant who developed an elevation in ALT of greater than three times the upper limit  
3  
4 of normal during the study period was withdrawn from the trial. Blood tests to monitor liver  
5  
6 function were undertaken at two and four weeks after randomisation and were  
7  
8 accompanied by a phone call to the participant to monitor adverse events. Participants  
9  
10 who experienced a rise in ALT two to three times the upper limit of normal during the first  
11  
12 six weeks of the study were required to have additional blood tests to monitor liver  
13  
14 function eight and 10 weeks after randomisation. In order to maintain investigator  
15  
16 blinding, results of liver function tests were kept from the study investigators and viewed  
17  
18 only by the allocated safety data reviewers (JT and PS). If further blood tests were  
19  
20 required at weeks eight and 10, contact was made with the participant by the safety  
21  
22 reviewer directly so as to maintain investigator blinding. If, during the course of the study,  
23  
24 any participant was found to have abnormal liver function which required their withdrawal  
25  
26 from the study, the safety investigator unblinded the participant in order to inform their  
27  
28 ongoing management and notified their health care provider.  
29  
30  
31  
32  
33

### 34 **Cytokine Measurement**

35  
36 Concentrations of IFN-  $\gamma$ , IL-4, IL-5 and IL-13 were measured by ELISA (Quantikine, R&D  
37  
38 Systems, Minneapolis, MN), according to the manufacturer's protocols. The ELISA  
39  
40 minimum detectable level for IFN-  $\gamma$  was 12.5 pg/ml, for IL-4 was 27.7 pg/ml, for IL-5 was  
41  
42 3.5 pg/ml and for IL-13 was 55.3 pg/ml.  
43  
44  
45  
46  
47

### 48 **Medication Compliance Monitoring**

49  
50 Compliance with study medication was determined by a review of the medication diary, a  
51  
52 count of the units of medication returned at the end of the first and second 6-week study  
53  
54 period, and blood paracetamol levels taken at weeks 2, 6 and 12.  
55  
56  
57

58  
59 At visit 3 and 4, participants returned their medication diary and any remaining study  
60  
medication from the first or second 6-week period of the study. All participants were given

1  
2 188 tablets of study medication at visit 2 and visit 3, which equated to 6 weeks of fully  
3  
4 compliant medication dosing and one extra week in case of a delay in follow-up. The  
5  
6 number of days that the participant had been randomised, and therefore the number of  
7  
8 doses of study medication expected to have been consumed over that time period were  
9  
10 calculated based on the entries in the medication diary. The remaining tablets of study  
11  
12 medication were then counted and were compared with the number of tablets expected to  
13  
14 be returned.  
15  
16  
17  
18  
19  
20  
21  
22  
23  
24  
25  
26  
27  
28  
29  
30  
31  
32  
33  
34  
35  
36  
37  
38  
39  
40  
41  
42  
43  
44  
45  
46  
47  
48  
49  
50  
51  
52  
53  
54  
55  
56  
57  
58  
59  
60

For peer review only

## References

Australasian Society of Clinical Immunology and Allergy. Skin Prick Testing for the Diagnosis of Allergic Disease, A Manual for Practitioners. 2006 (Revised March 2009).  
Cockcroft DW, Murdock KY, et al. Determination of histamine PC20. Comparison of linear and logarithmic interpolation. *Chest* 1983;**84**:505-6

For peer review only



**Table E1: Participant recruitment failures****Excluded at Phone Screen (n=486)**

|     |                                                                                                                                                    |
|-----|----------------------------------------------------------------------------------------------------------------------------------------------------|
| 200 | Declined to participate                                                                                                                            |
| 56  | Smoker/Ex-smoker                                                                                                                                   |
| 39  | Contraindication to trial/paracetamol (incl: planned surgery, use of contraindicated meds, chronic pain conditions, allergy to NSAIDS/paracetamol) |
| 37  | Asthma too severe                                                                                                                                  |
| 35  | Currently using regular paracetamol                                                                                                                |
| 35  | Asthma too mild/no asthma                                                                                                                          |
| 34  | Unable to travel to study site                                                                                                                     |
| 18  | History suicide attempt/current depression                                                                                                         |
| 10  | Breastfeeding, pregnant, no contraception                                                                                                          |
| 8   | Trial period ended                                                                                                                                 |
| 7   | History of liver disease                                                                                                                           |
| 6   | Age outside range                                                                                                                                  |
| 1   | High weekly alcohol intake                                                                                                                         |

**Excluded at Visit 1 (n=57)**

|    |                                                                                                                                                    |
|----|----------------------------------------------------------------------------------------------------------------------------------------------------|
| 19 | FEV <sub>1</sub> <70% predicted                                                                                                                    |
| 11 | Raised ALT                                                                                                                                         |
| 10 | History suicide attempt/current depression                                                                                                         |
| 5  | Lost to follow up/withdrew consent                                                                                                                 |
| 4  | Smoker/ex-smoker>10py                                                                                                                              |
| 3  | Contraindication to trial/paracetamol (incl: planned surgery, use of contraindicated meds, chronic pain conditions, allergy to NSAIDS/paracetamol) |
| 2  | High weekly alcohol intake                                                                                                                         |
| 1  | No contraception                                                                                                                                   |
| 1  | High blood pressure                                                                                                                                |
| 1  | Age outside range                                                                                                                                  |

**Excluded at Visit 2 (n=87)**

|    |                                    |
|----|------------------------------------|
| 68 | PC <sub>20</sub> > 16 mg/ml        |
| 9  | Lost to follow up/withdrew consent |
| 7  | FEV <sub>1</sub> < 70% predicted   |
| 3  | PC <sub>20</sub> < 0.0125 mg/ml    |

Table E2: Participants with detectable levels of cytokines

| Variable (detectable level)                 | N/N (%)      |              |
|---------------------------------------------|--------------|--------------|
|                                             | Paracetamol  | Placebo      |
| <b>IFN-<math>\gamma</math> (12.5 pg/ml)</b> |              |              |
| Visit 2                                     | 21/36 (58.3) | 33/58 (56.9) |
| Visit 3                                     | 25/29 (86.2) | 40/55 (72.7) |
| Visit 4                                     | 26/31 (83.9) | 44/53 (83.0) |
| <b>IL-4 (27.7 pg/ml)</b>                    |              |              |
| Visit 2                                     | 1/36 (2.8)   | 3/58 (5.2)   |
| Visit 3                                     | 4/29 (13.8)  | 1/55 (1.8)   |
| Visit 4                                     | 2/31 (6.5)   | 2/53 (3.8)   |
| <b>IL-5 (3.5 pg/ml)</b>                     |              |              |
| Visit 2                                     | 1/36 (2.8)   | 2/58 (3.5)   |
| Visit 3                                     | 3/29 (10.3)  | 4/55 (7.8)   |
| Visit 4                                     | 3/31 (9.7)   | 0/53 (0)     |
| <b>IL-13 (55.3 pg/ml)</b>                   |              |              |
| Visit 2                                     | 0/36 (0)     | 4/58 (6.9)   |
| Visit 3                                     | 1/29 (3.5)   | 3/55 (5.5)   |
| Visit 4                                     | 1/31 (3.2)   | 7/53 (13.2)  |

**Abbreviations:** IFN- $\gamma$  = Interferon gamma; IL-4/5/13 = Interleukin 4/5/13

**Table E3: Effect of paracetamol use on BHR, lung function and asthma control**

|                      | BASELINE            |                 | WEEK 6              |                 | Difference<br>(adjusted for<br>baseline) |
|----------------------|---------------------|-----------------|---------------------|-----------------|------------------------------------------|
|                      | Paracetamol<br>N=36 | Placebo<br>N=58 | Paracetamol<br>N=32 | Placebo<br>N=55 |                                          |
| FEV <sub>1</sub> (L) | 3.06<br>(0.73)      | 3.05<br>(0.83)  | 3.08<br>(0.78)      | 3.13<br>(0.83)  | -0.03<br>(-0.14 to 0.08)<br>P=0.54       |
| ACQ score            | 0.81<br>(0.47)      | 0.93<br>(0.59)  | 0.74<br>(0.49)      | 0.78<br>(0.50)  | 0.04<br>(-0.13 to 0.22)<br>P=0.62        |
| Log FeNO (ppb)       | 3.53<br>(0.71)      | 3.66<br>(0.78)  | 3.59<br>(0.68)      | 3.67<br>(0.71)  | 0.001<br>(-0.15 to 0.16)<br>P=0.99       |

Numbers are mean (SD)

**Abbreviations:**

FEV<sub>1</sub> = Forced expiratory volume in one second; ACQ = Asthma Control Questionnaire;

FeNO = Fractional exhaled nitric oxide



## CONSORT 2010 checklist of information

Page numbers refer to the page in the manuscript [top right of document]. OS: Online supplement. P: Protocol, N/A: Not applicable

| Section/Topic                    | Item No | Checklist item                                                                                                                                                                              | Reported on page No |
|----------------------------------|---------|---------------------------------------------------------------------------------------------------------------------------------------------------------------------------------------------|---------------------|
| <b>Title and abstract</b>        |         |                                                                                                                                                                                             |                     |
|                                  | 1a      | Identification as a randomised trial in the title                                                                                                                                           | 1                   |
|                                  | 1b      | Structured summary of trial design, methods, results, and conclusions (for specific guidance see CONSORT for abstracts)                                                                     | 2-3                 |
| <b>Introduction</b>              |         |                                                                                                                                                                                             |                     |
| Background and objectives        | 2a      | Scientific background and explanation of rationale                                                                                                                                          | 4                   |
|                                  | 2b      | Specific objectives or hypotheses                                                                                                                                                           | 5                   |
| <b>Methods</b>                   |         |                                                                                                                                                                                             |                     |
| Trial design                     | 3a      | Description of trial design (such as parallel, factorial) including allocation ratio                                                                                                        | 6-8, Fig 1          |
|                                  | 3b      | Important changes to methods after trial commencement (such as eligibility criteria), with reasons                                                                                          | N/A                 |
| Participants                     | 4a      | Eligibility criteria for participants                                                                                                                                                       | 6                   |
|                                  | 4b      | Settings and locations where the data were collected                                                                                                                                        | 6-8                 |
| Interventions                    | 5       | The interventions for each group with sufficient details to allow replication, including how and when they were actually administered                                                       | 7-8                 |
| Outcomes                         | 6a      | Completely defined pre-specified primary and secondary outcome measures, including how and when they were assessed                                                                          | 8, OS               |
|                                  | 6b      | Any changes to trial outcomes after the trial commenced, with reasons                                                                                                                       | None                |
| Sample size                      | 7a      | How sample size was determined                                                                                                                                                              | 10                  |
|                                  | 7b      | When applicable, explanation of any interim analyses and stopping guidelines                                                                                                                | None                |
| <b>Randomisation:</b>            |         |                                                                                                                                                                                             |                     |
| Sequence generation              | 8a      | Method used to generate the random allocation sequence                                                                                                                                      | 7                   |
|                                  | 8b      | Type of randomisation; details of any restriction (such as blocking and block size)                                                                                                         | 7                   |
| Allocation concealment mechanism | 9       | Mechanism used to implement the random allocation sequence (such as sequentially numbered containers), describing any steps taken to conceal the sequence until interventions were assigned | 7                   |
| Implementation                   | 10      | Who generated the random allocation sequence, who enrolled participants, and who assigned participants to interventions                                                                     | 7, OS               |

|    |                                                                                                                                            |     |                                                                                                                                                   |                       |
|----|--------------------------------------------------------------------------------------------------------------------------------------------|-----|---------------------------------------------------------------------------------------------------------------------------------------------------|-----------------------|
| 1  |                                                                                                                                            |     |                                                                                                                                                   |                       |
| 2  | Blinding                                                                                                                                   | 11a | If done, who was blinded after assignment to interventions (for example, participants, care providers, those assessing outcomes) and how          | 7                     |
| 3  |                                                                                                                                            | 11b | If relevant, description of the similarity of interventions                                                                                       | 7                     |
| 4  | Statistical methods                                                                                                                        | 12a | Statistical methods used to compare groups for primary and secondary outcomes                                                                     | 9                     |
| 5  |                                                                                                                                            | 12b | Methods for additional analyses, such as subgroup analyses and adjusted analyses                                                                  | 9                     |
| 6  |                                                                                                                                            |     |                                                                                                                                                   |                       |
| 7  |                                                                                                                                            |     |                                                                                                                                                   |                       |
| 8  |                                                                                                                                            |     |                                                                                                                                                   |                       |
| 9  | <b>Results</b>                                                                                                                             |     |                                                                                                                                                   |                       |
| 10 | Participant flow (a diagram is strongly recommended)                                                                                       | 13a | For each group, the numbers of participants who were randomly assigned, received intended treatment, and were analysed for the primary outcome    | 11, Fig 2             |
| 11 |                                                                                                                                            | 13b | For each group, losses and exclusions after randomisation, together with reasons                                                                  | 11, Fig 2, OS Table 1 |
| 12 | Recruitment                                                                                                                                | 14a | Dates defining the periods of recruitment and follow-up                                                                                           | 11                    |
| 13 |                                                                                                                                            | 14b | Why the trial ended or was stopped                                                                                                                | 11                    |
| 14 | Baseline data                                                                                                                              | 15  | A table showing baseline demographic and clinical characteristics for each group                                                                  | Table 1               |
| 15 | Numbers analysed                                                                                                                           | 16  | For each group, number of participants (denominator) included in each analysis and whether the analysis was by original assigned groups           | 11,12                 |
| 16 | Outcomes and estimation                                                                                                                    | 17a | For each primary and secondary outcome, results for each group, and the estimated effect size and its precision (such as 95% confidence interval) | 11,12, Tables 2 and 3 |
| 17 |                                                                                                                                            | 17b | For binary outcomes, presentation of both absolute and relative effect sizes is recommended                                                       | 11,12                 |
| 18 | Ancillary analyses                                                                                                                         | 18  | Results of any other analyses performed, including subgroup analyses and adjusted analyses, distinguishing pre-specified from exploratory         | OS Tables 2 and 3     |
| 19 | Harms                                                                                                                                      | 19  | All important harms or unintended effects in each group (for specific guidance see CONSORT for harms)                                             | 11,12                 |
| 20 |                                                                                                                                            |     |                                                                                                                                                   |                       |
| 21 | <b>Discussion</b>                                                                                                                          |     |                                                                                                                                                   |                       |
| 22 | Limitations                                                                                                                                | 20  | Trial limitations, addressing sources of potential bias, imprecision, and, if relevant, multiplicity of analyses                                  | 13-15                 |
| 23 | Generalisability                                                                                                                           | 21  | Generalisability (external validity, applicability) of the trial findings                                                                         | 13                    |
| 24 | Interpretation                                                                                                                             | 22  | Interpretation consistent with results, balancing benefits and harms, and considering other relevant evidence                                     | 15,16                 |
| 25 |                                                                                                                                            |     |                                                                                                                                                   |                       |
| 26 | <b>Other information</b>                                                                                                                   |     |                                                                                                                                                   |                       |
| 27 | Registration                                                                                                                               | 23  | Registration number and name of trial registry                                                                                                    | 3                     |
| 28 | Protocol                                                                                                                                   | 24  | Where the full trial protocol can be accessed, if available                                                                                       | 3                     |
| 29 | Funding                                                                                                                                    | 25  | Sources of funding and other support (such as supply of drugs), role of funders                                                                   | 17                    |
| 30 |                                                                                                                                            |     |                                                                                                                                                   |                       |
| 31 |                                                                                                                                            |     |                                                                                                                                                   |                       |
| 32 |                                                                                                                                            |     |                                                                                                                                                   |                       |
| 33 |                                                                                                                                            |     |                                                                                                                                                   |                       |
| 34 |                                                                                                                                            |     |                                                                                                                                                   |                       |
| 35 |                                                                                                                                            |     |                                                                                                                                                   |                       |
| 36 |                                                                                                                                            |     |                                                                                                                                                   |                       |
| 37 |                                                                                                                                            |     |                                                                                                                                                   |                       |
| 38 |                                                                                                                                            |     |                                                                                                                                                   |                       |
| 39 |                                                                                                                                            |     |                                                                                                                                                   |                       |
| 40 |                                                                                                                                            |     |                                                                                                                                                   |                       |
| 41 |                                                                                                                                            |     |                                                                                                                                                   |                       |
| 42 |                                                                                                                                            |     |                                                                                                                                                   |                       |
| 43 |                                                                                                                                            |     |                                                                                                                                                   |                       |
| 44 | CONSORT 2010 checklist                                                                                                                     |     |                                                                                                                                                   | Page 2                |
| 45 |                                                                                                                                            |     |                                                                                                                                                   |                       |
| 46 | For peer review only - <a href="http://bmjopen.bmj.com/site/about/guidelines.xhtml">http://bmjopen.bmj.com/site/about/guidelines.xhtml</a> |     |                                                                                                                                                   |                       |
| 47 |                                                                                                                                            |     |                                                                                                                                                   |                       |
| 48 |                                                                                                                                            |     |                                                                                                                                                   |                       |
| 49 |                                                                                                                                            |     |                                                                                                                                                   |                       |
